# Supplementary material for: Chemotherapy Induces Senescence-Like Resilient Cells Capable of Initiating AML Recurrence
Source: Oxford University Press journal article supplement (doi:10.1158/2159-8290.cd-20-1375), 2021-01-26
Supplement: 252204_2_supp_6841542_qm6m08.xlsx [file 252204_2_supp_6841542_qm6m08.xlsx]

## Sheet: Supplementary_Table_3_TOP10_DEG
Gene	cluster	p_val	avg_logFC	p_val_adj
RRM2	0	0	0.906116	0
TYMS	0	0	0.791266	0
TMEM106C	0	0	0.665566	0
TK1	0	0	0.618161	0
FEN1	0	1.97e-248	0.532854	3.51e-244
FAM111A	0	2.72e-248	0.537653	4.85e-244
MYBL2	0	7.8e-248	0.513926	1.39e-243
ATAD2	0	1.2e-234	0.534213	2.14e-230
RRM1	0	7.98e-225	0.491954	1.42e-220
S100A8	0	1.19e-128	0.704819	2.12e-124
HJURP	1	6.2e-107	-0.250716	1.11e-102
CDC6	1	9.61e-85	-0.25698	1.72e-80
DTL	1	3.6e-84	-0.256833	6.42e-80
HIST1H2BK	1	1.95e-81	0.319904	3.48e-77
RCCD1	1	4.01e-78	-0.257916	7.16e-74
HIST1H1D	1	1.28e-71	-0.257619	2.29e-67
CARHSP1	1	9.82e-55	-0.256952	1.75e-50
MCM4	1	7.66e-52	-0.253131	1.37e-47
CKLF	1	3.97e-51	-0.258252	7.08e-47
JUNB	1	5.11e-39	-0.253174	9.12e-35
PHGDH	2	7.28e-100	0.407064	1.3e-95
IFT57	2	8.57e-90	0.431263	1.53e-85
ASNS	2	7.85e-89	0.25561	1.4e-84
SLC7A5	2	1.99e-88	0.372831	3.55e-84
CDCA7	2	4.65e-87	0.366214	8.3e-83
MYC	2	5.73e-87	0.486343	1.02e-82
PSAT1	2	1.47e-75	0.33893	2.63e-71
C3AR1	2	2.48e-61	-0.337449	4.42e-57
FOSB	2	1.11e-56	-0.278752	1.99e-52
CD82	2	4.36e-47	-0.313221	7.78e-43
INHBA	3	6.77e-197	1.12288	1.21e-192
C1orf186	3	1.21e-190	0.709961	2.15e-186
RGS16	3	1.63e-154	0.846251	2.91e-150
GATA2	3	1.23e-149	0.57899	2.19e-145
GNLY	3	2.69e-137	0.952226	4.8e-133
TNFAIP6	3	6.37e-135	0.578524	1.14e-130
HGF	3	4.85e-127	0.618593	8.66e-123
APOD	3	3.31e-120	0.917809	5.9e-116
CKAP4	3	5.87e-108	0.593703	1.05e-103
RNASE3	3	6.02e-85	0.56215	1.07e-80
ZFP36L1	4	1.53e-302	1.36247	2.74e-298
CD36	4	4.57e-238	1.84709	8.16e-234
CD14	4	5.02e-200	2.03933	8.95e-196
FUCA1	4	2.01e-199	1.62501	3.58e-195
PLIN2	4	2.89e-188	1.68841	5.16e-184
APOE	4	4.37e-182	3.03212	7.79e-178
GPNMB	4	8.36e-164	1.72871	1.49e-159
FN1	4	4.84e-106	1.66155	8.63e-102
APOC1	4	1.28e-84	1.40933	2.28e-80
FABP4	4	3.15e-72	2.87893	5.62e-68
CDC20	5	6.25e-151	0.947409	1.12e-146
PLK1	5	4.45e-138	0.8414	7.94e-134
CCNB1	5	1.04e-135	0.94678	1.85e-131
HMMR	5	1.06e-108	0.689243	1.89e-104
ASPM	5	1.25e-106	0.878839	2.23e-102
UBE2C	5	3.44e-106	1.07146	6.13e-102
CENPF	5	2.24e-102	1.07038	3.99e-98
KPNA2	5	1.46e-96	0.842497	2.61e-92
PTTG1	5	2.82e-95	0.864856	5.02e-91
CKS2	5	3.31e-92	0.701963	5.9e-88
CDC20	6	3.53e-83	0.95051	6.3e-79
UBE2C	6	6.79e-64	0.989487	1.21e-59
ARL6IP1	6	1.26e-60	0.88117	2.24e-56
CCNB1	6	2.48e-58	0.741251	4.43e-54
CDKN1A	6	1.02e-53	0.857029	1.82e-49
HMMR	6	2.16e-52	0.721184	3.86e-48
KPNA2	6	1.11e-46	0.776704	1.97e-42
NCF1	6	1.15e-44	0.898678	2.05e-40
TOP2A	6	2e-40	0.777486	3.58e-36
PTTG1	6	5.17e-39	0.701666	9.23e-35
