# Supplementary material for: Chemotherapy Induces Senescence-Like Resilient Cells Capable of Initiating AML Recurrence
Source: Oxford University Press journal article supplement (doi:10.1158/2159-8290.cd-20-1375), 2021-01-26
Supplement: 21598290cd201375-sup-252204_2_supp_6841528_qmlm08.xlsx [file 21598290cd201375-sup-252204_2_supp_6841528_qmlm08.xlsx]

## Sheet: AML1566_diffExpr_log2vsMean
Genes	Sample_Ctrl_1	Sample_Ctrl_2	Sample_Ctrl_3	Sample_AraC_1	Sample_AraC_2	Sample_AraC_3
A2M	0.174013	-0.236325	0.0326692	2.02459	1.78382	1.80782
AACS	0.030287	0.0122829	-0.0435946	1.52294	1.4439	1.47035
ABCA10	-0.06935	0.0253518	0.0415302	2.04473	1.90387	2.03644
ABCA12	0.279708	-0.457641	0.0811687	0.715398	0.635942	1.13839
ABCA13	0.0892468	-0.130951	0.0327444	1.43538	1.6028	1.79523
ABCA5	0.0267562	-0.134376	0.0979033	1.35699	1.30272	1.46518
ABCA6	0.0836897	-0.171941	0.0739951	2.46479	2.35184	2.42427
ABCA7	0.208328	-0.218172	-0.0218074	1.34368	1.52964	1.03891
ABCA9	0.35592	-0.0231424	-0.442003	2.06817	2.09233	2.33436
ABCC6	0.340336	-0.14646	-0.267975	1.85003	1.79242	1.71458
ABCG1	-0.208288	0.00934258	0.17369	1.70273	1.76285	1.59776
ABHD4	-0.161371	0.164796	-0.0220719	1.03914	0.880461	1.10859
ABHD8	-0.182045	0.176689	-0.0170366	1.28527	1.17416	1.16674
ABI3	0.190193	-0.0238343	-0.191873	1.64831	1.31777	1.46648
ABTB1	-0.0414123	0.159095	-0.133353	1.3991	1.46642	1.26826
ACACB	0.28406	-0.149606	-0.182971	1.37459	1.52722	1.47659
ACADL	0.165721	-0.0971098	-0.0841057	1.22197	1.28947	1.31156
ACAP1	0.032631	0.0891288	-0.130687	1.03609	1.08132	0.970404
ACE	0.175067	-0.098408	-0.0940023	1.22501	1.16001	1.54944
ACSF2	-0.170774	0.172905	-0.0228181	2.00161	1.91728	1.67558
ACSM1	0.386586	-0.205669	-0.276542	1.29365	1.55418	1.73721
ACSS1	-0.0959099	0.0671281	0.0238783	0.994094	1.15093	1.182
ACVR1C	0.0857185	0.179172	-0.310165	1.56397	1.43184	1.55894
ACVRL1	0.0825296	-0.149614	0.0560777	2.47828	2.4998	2.53745
ACY3	0.49281	-0.845091	0.0512212	0.886759	1.40602	0.887625
ADAM28	0.0391869	-0.350039	0.248416	1.83267	1.92389	1.96201
ADAMDEC1	-0.314296	0.200411	0.0658907	1.15161	1.23864	1.18497
ADAMTS10	0.231082	-0.063582	-0.201909	2.61288	2.91989	2.5005
ADAMTS15	0	0	0	0.730363	0.945724	0.703195
ADAMTS20	-0.154752	-0.0858193	0.213458	0.853195	0.690092	1.40403
ADAMTS4	-0.0214133	-0.067559	0.0847198	1.63964	2.00809	1.59591
ADAMTS6	0.0193128	0.205494	-0.262846	1.17977	1.69487	0.688798
ADAMTS7	-0.201601	-0.0154196	0.190357	0.727857	1.16283	0.6678
ADAMTSL4	0.23572	-0.0453203	-0.228653	0.978807	1.53429	0.811506
ADC	0.0692918	-0.0157334	-0.056424	1.27623	1.56603	1.45744
ADCY4	-0.424913	0.553172	-0.344083	1.70344	1.69275	2.12878
ADCY6	0.384869	-0.331941	-0.152337	2.77258	3.2085	3.01046
ADD3	0.034104	-0.0572272	0.0214367	1.06047	1.11176	1.18501
ADPRH	0.15873	0.169421	-0.397659	1.61295	1.33335	1.60671
ADRA2B	0.322939	-0.599747	0.123341	1.12564	1.19508	0.762172
AGAP7	0.654469	-0.715589	-0.29158	1.96679	2.45236	2.54235
AGBL2	-0.820187	0.217576	0.345797	1.24265	0.970148	0.602721
AGPAT4-IT1	0.289314	-0.121024	-0.220268	1.01699	0.849045	1.23071
AGPHD1	-0.0362462	0.233425	-0.235844	1.34976	1.27515	1.29465
AGRP	0.325506	0.118827	-0.59718	1.12821	1.43393	1.74841
AHNAK2	0.141072	-0.272614	0.0968787	1.07017	1.4408	1.30025
AIM2	-0.300676	0.0441181	0.210483	1.51737	2.04094	1.8587
AKR1C1	-0.340476	0.21297	0.0719649	1.36391	0.692233	1.15399
AKR1C2	-0.517138	0.198869	0.20595	1.20825	1.40066	1.63815
AKR1C3	-0.13578	0.27364	-0.182837	1.3886	1.18736	1.26797
ALDH1A2	-0.295393	-0.0469263	0.283511	0.558515	1.06425	1.00301
ALDH2	-0.0994638	0.130608	-0.0411724	1.27796	1.25516	1.17008
ALDH7A1	0.105926	0.131002	-0.270972	1.13374	1.0759	0.68669
ALOX12P2	0.41358	-0.261869	-0.261869	2.38716	2.30847	2.88403
ALOX15	-0.440835	-0.0356586	0.364803	1.31875	1.04037	1.06409
ALOX5	0.0409954	0.0584237	-0.104931	1.00473	1.28211	0.952501
AMIGO2	0.117741	-0.134713	0.00592414	2.16332	2.16405	2.42282
AMOT	0.105926	0.131002	-0.270972	0.941979	1.0759	0.902932
AMPD3	-0.0377426	0.0328888	0.00398112	1.4744	1.32997	1.48137
ANGPT4	-0.510714	0.363697	0.0163628	1.67401	1.45728	1.40476
ANGPTL1	0.388302	0.289528	-1.09263	1.70054	1.23315	0.957192
ANGPTL4	0.605338	-0.439249	-0.432168	1.05414	1.55776	0.657213
ANGPTL6	0.094651	0.192938	-0.341713	1.64931	1.44348	1.31427
ANK1	-0.0376427	-0.310415	0.286106	0.996061	1.43475	1.39797
ANKRD28	0.0825899	-0.132938	0.0413979	1.04487	1.10162	1.14803
ANKRD57	0.120523	-0.0510322	-0.0776107	1.32001	1.22933	1.13092
ANKRD6	0.0168213	-0.119415	0.0945212	1.42521	1.31923	1.21784
ANTXRL	-0.238496	-0.21342	0.367238	0.958548	1.30241	1.43442
APBB1	-0.271283	0.290555	-0.0765732	1.71186	1.51074	1.4569
APOBEC3B	-0.192734	0.174158	-0.00469918	1.63811	1.59614	1.57958
APOBEC3F	-0.234581	0.331818	-0.165742	1.78694	1.34475	1.29597
APOBEC3G	0.0478156	0.110936	-0.174014	1.58701	1.48718	1.57495
APOBEC3H	-0.240155	0.280373	-0.0910535	1.35311	1.69802	1.40777
APOC1	-0.263295	0.30354	-0.100595	1.39534	1.48151	1.27035
APOC1P1	-0.146792	0.255182	-0.146792	0.84495	1.77101	1.21513
APOD	-0.263528	0.194938	0.031786	1.32177	1.50879	1.30271
APOL1	0.0930838	-0.0270246	-0.0711031	1.82041	2.03883	1.7231
APOL3	-0.0652163	0.0238868	0.0391428	2.10594	1.8696	2.07342
APOL6	0.027936	-0.0807403	0.0494568	1.06049	0.858987	1.18615
AQP1	0.479375	-0.541621	-0.12208	2.9713	2.67747	2.81785
AQP9	0.0209084	0.185687	-0.23779	2.61004	2.53319	2.52833
ARHGAP31	0.107232	-0.362935	0.195674	1.12194	1.05026	1.01621
ARHGAP6	0.351801	0.191867	-0.781886	1.42751	1.35427	1.56371
ARHGEF25	-0.0842858	0.265192	-0.226083	1.06586	1.16838	1.02254
ART3	-0.121323	0.124964	-0.014244	1.33783	1.44423	1.31848
ASAP3	0.100825	-0.316856	0.169664	0.82958	0.998245	1.31273
ASB9P1	0.0482413	-0.0902737	0.037947	0.993606	1.02125	0.813428
ATG9B	0	0	0	0.730363	1.16019	0.394024
ATOH8	-0.284988	0.249368	-0.0136765	1.51612	1.62677	1.68159
ATP2B2	0.326566	0.00331213	-0.427252	0.516781	1.12555	0.919807
ATP6V1G2	-0.234098	0.230165	-0.0338429	0.75667	0.614004	1.42879
ATP9A	0.0538531	-0.0699853	0.0133818	1.03532	0.932169	1.12604
AXL	-0.164047	0.00872026	0.139364	3.98832	4.0921	3.95252
BACH2	-0.0283583	0.269946	-0.297428	1.39895	1.53027	1.64179
BAIAP3	0.468233	0.0330633	-0.752914	1.0501	1.41105	0.995998
BCAN	-0.280018	0.435989	-0.280018	0.932934	1.06685	0.893886
BCAR1	0.112594	-0.034313	-0.085691	1.23673	0.908474	0.794495
BCAS1	-0.0271647	0.489743	-0.702614	1.78626	1.62316	1.10985
BCL2A1	-0.09992	-0.048437	0.137414	1.85372	1.83414	1.60261
BEGAIN	-0.162641	0.04037	0.108671	1.33905	0.928865	0.298947
BEST1	0.161512	0.104808	-0.310807	1.96584	2.28894	2.15876
BEX4	0.0903708	-0.092501	-0.00366796	1.33235	1.59876	1.45564
BHLHE41	-0.106555	-0.0421305	0.137474	2.1455	2.31435	2.30343
BIK	-0.172871	0.178121	-0.0269183	1.17294	1.08153	1.14463
BLNK	0.084677	0.160216	-0.282622	1.3096	2.15949	1.70559
BMF	0.0158736	-0.0733148	0.0544801	1.29161	1.34016	1.33035
BMX	0.0134495	-0.330526	0.257478	2.45297	2.17956	2.45723
BNC2	0.322939	-0.599747	0.123341	1.50301	0.912384	0.928485
BRSK1	-0.384145	0.315858	-0.0159357	1.57931	1.61877	1.47229
BTBD19	-0.123574	0.298752	-0.231059	0.665789	1.51568	1.01763
BTBD8	-0.529319	0.167168	0.243993	1.03177	1.01316	1.36341
BTG1	-0.0974876	0.106857	-0.0167441	1.01821	1.01483	0.981023
BTG2	0.0779021	0.00596227	-0.0886894	1.22395	1.10844	1.09827
C10orf10	0.360982	-0.562619	0.0546798	0.942412	1.08216	1.38748
C10orf128	-0.404912	-0.0029386	0.318175	1.58268	1.92086	1.94068
C11orf20	0.24003	-0.136868	-0.136868	0.593495	0.808856	1.54047
C11orf35	0.395365	-0.191042	-0.306232	1.42404	1.5105	1.41901
C11orf45	0.112904	-0.124317	0.00167114	1.82014	1.68723	1.75225
C11orf9	0.332707	-0.183208	-0.217787	0.946804	1.29967	0.691707
C12orf59	-0.0641111	0.0113621	0.0504095	1.15428	0.955831	1.03888
C15orf27	-0.177027	-0.0819627	0.227377	1.01818	0.993462	0.884128
C16orf93	-0.119054	0.126571	-0.0181287	1.15581	1.06943	1.33492
C16orf96	0.186279	0.0276625	-0.246712	0.762703	0.90455	0.782457
C17orf103	0.161893	-0.173973	-0.00745289	2.04823	2.13432	2.02254
C17orf105	0.261431	-0.470282	0.110376	0.701686	1.53973	1.17756
C17orf67	-0.0391434	0.311652	-0.348061	1.31203	0.841744	1.47317
C19orf21	0.41358	-0.261869	-0.261869	2.04682	1.25026	0.912035
C19orf38	-0.0643068	0.207219	-0.169526	1.15833	0.878147	0.96836
C19orf59	-0.16009	0.17507	-0.0350299	1.48244	1.51101	1.5451
C19orf66	0.0383627	-0.0588482	0.0186656	1.08684	1.0223	0.907867
C19orf69	0.0782383	-0.265738	0.153803	0.969904	1.08628	0.915801
C19orf77	0.335312	0.0899392	-0.569127	1.96596	2.2309	2.21415
C1orf127	0.426967	-0.185629	-0.365257	1.08125	2.0308	1.62841
C1orf186	-0.228288	-0.015594	0.210518	2.69669	2.65223	2.71038
C1orf187	-0.716007	0.833853	-0.716007	1.38675	1.07882	0.961332
C1orf228	0.197322	-0.235662	0.00595611	1.40555	1.32066	1.21437
C1orf54	-0.097793	0.141926	-0.0556496	1.89519	2.06072	1.91815
C1orf88	-0.280018	0.435989	-0.280018	1.12469	1.06685	1.39732
C1R	0.370107	-0.231616	-0.224535	0.91482	2.12435	1.10219
C1RL	-0.049839	0.0252026	0.0233736	1.57619	1.59662	1.51069
C2	0.0150242	0.079449	-0.100179	1.55747	1.71531	1.12939
C20orf123	-0.23614	-0.163581	0.331338	1.58072	1.65945	1.33253
C21orf7	-0.187063	0.440112	-0.38666	0.615643	1.5337	1.32234
C22orf36	0.0714691	0.233269	-0.370119	1.29846	1.43771	0.922716
C2orf62	-0.405227	0.375128	-0.0771511	1.23421	0.852194	0.568176
C2orf65	-0.252576	0.0711721	0.150603	1.21298	1.19906	1.06921
C2orf71	-0.148546	-0.148546	0.257833	0.843196	0.797178	1.21337
C3	0.0129716	-0.0426094	0.0286695	1.1613	1.19868	1.09755
C3AR1	-0.19611	0.140511	0.0353469	2.68004	2.62819	2.69032
C4orf19	0.0604456	-0.0098668	-0.0528531	1.07698	0.943598	0.993702
C5	0.135947	-0.108773	-0.0382876	1.22331	1.22892	1.31159
C5orf41	0.0960839	-0.145935	0.0389114	1.17851	1.14079	1.16038
C5orf63	-0.0307426	-0.304218	0.27644	0.86775	1.32492	0.82204
C6orf105	0.00176544	0.0175243	-0.0195293	2.27447	2.24456	2.47933
C6orf124	0.259239	-0.0733183	-0.229884	1.47766	1.50081	0.808912
C6orf223	-0.0533444	0.189589	-0.158652	1.45114	1.38234	1.51423
C7orf29	0.24003	-0.136868	-0.136868	2.51216	2.1889	2.01842
C8orf47	0.176442	0.216999	-0.499007	0.492735	1.16139	1.65628
C9orf106	0.176442	0.216999	-0.499007	1.71039	2.14444	2.01469
C9orf7	-0.0355792	0.426046	-0.554668	1.22469	0.930861	0.904644
CA7	0.133236	-0.0774973	-0.065599	1.09554	1.15204	1.23679
CACNA1A	-0.449817	0.46363	-0.169977	1.83511	1.53113	1.61102
CACNA1E	0.123754	-0.0628737	-0.0693334	1.14628	1.28674	1.22323
CACNA2D4	-0.0215189	0.136924	-0.127768	1.04634	1.10286	1.02938
CACNB4	0.0880658	-0.156555	0.0564327	1.61377	1.46644	1.89586
CALCRL	-0.0457456	-0.504248	0.40728	1.63766	1.4568	1.57158
CAMK4	-0.015675	0.0623569	-0.0489553	1.40894	1.2761	1.52625
CAMP	-0.313043	0.228578	0.0333398	1.29119	0.361705	1.56637
CAP2	0.0267967	-0.0470583	0.0191246	1.41247	1.39797	1.45931
CAPN11	-0.146792	0.255182	-0.146792	2.64638	2.34654	2.51744
CAPN5	-0.811571	0.162182	0.390955	1.91133	1.5142	1.23825
CAPN6	-0.385714	0.259211	0.0534949	2.54896	2.29815	2.32221
CAPSL	0.54109	-0.374665	-0.370259	1.87239	1.93638	1.37865
CARD10	0.044814	0.18294	-0.26317	1.07566	1.20421	1.0566
CASP7	-0.103433	-0.0555062	0.146561	1.01255	0.785052	1.17971
CASS4	-0.0927278	-0.284654	0.311867	1.66175	2.01349	1.77481
CATSPER1	0.327368	0.183426	-0.713828	1.82429	1.323	1.91605
CAV1	-0.143076	-0.0473513	0.172106	1.06977	1.13548	0.982751
CAV2	-0.116909	0.199417	-0.105312	1.16877	1.26028	1.05899
CBR3	-0.148726	0.277239	-0.174491	1.55616	1.47556	1.21681
CBX7	-0.0035839	0.151819	-0.165675	0.958351	1.15447	0.783729
CCBP2	0.0118771	0.0938439	-0.113218	1.83604	1.77919	1.20474
CCDC102A	-0.0986812	0.454723	-0.523682	1.67383	1.44799	1.81949
CCDC135	-0.235333	0.18084	0.0242742	0.618575	1.47383	1.14467
CCDC136	0.115849	-0.0981779	-0.0259481	1.19564	1.44627	1.22267
CCDC141	0	0	0	0.991742	0.945724	0.957662
CCDC153	0.539243	0.160803	-1.22135	1.57182	0.57348	1.6428
CCDC155	0.237836	0.063834	-0.366731	1.88401	1.48901	1.44177
CCDC162P	-0.186162	0.591238	-0.702468	0.993906	1.02731	1.7553
CCDC24	-0.151941	0.232785	-0.112693	1.03298	0.881472	1.05906
CCDC63	-0.154752	-0.0858193	0.213458	1.40865	1.26795	1.65615
CCDC74A	0.0269265	0.104958	-0.142899	1.63192	1.66762	1.65088
CCDC88B	0.0992044	-0.0997118	-0.00636478	1.54058	1.63078	1.33216
CCKBR	-0.81662	-0.00116125	0.519073	1.29536	1.29982	0.7425
CCL20	-0.121543	0.132196	-0.0220456	1.51437	1.78409	1.78288
CCL23	0.198273	-0.0251289	-0.201008	1.6361	1.55943	1.61187
CCL25	0.0455184	0.0965862	-0.154079	1.52443	1.69317	0.296737
CCL3	-0.159379	0.360138	-0.284474	2.09513	2.00577	1.80366
CCNA1	-0.124718	0.06166	0.0554049	1.27901	1.26481	1.35475
CCNG2	-0.0652871	0.0812557	-0.0198921	1.17115	1.21019	1.16449
CCNJL	-0.135058	-0.18874	0.277384	1.29265	1.28476	1.3594
CCR10	0.105926	0.131002	-0.270972	1.13374	1.0759	1.09095
CCR7	0.326314	0.0316494	-0.46591	2.95952	2.90719	2.49819
CCR8	-0.122474	-0.0819166	0.184709	1.51077	0.714208	1.01455
CCRL2	-0.112676	0.514498	-0.628982	2.22282	2.40811	2.25646
CD101	0.0281143	-0.031149	0.00242311	1.20884	1.09949	1.20374
CD109	0.156719	-0.220796	0.0386599	1.12547	1.18082	1.26847
CD14	-0.0841309	0.175973	-0.109481	1.62611	1.52806	1.53449
CD163L1	-0.132569	-0.107493	0.213621	1.35298	0.650726	1.01876
CD177	0.0193128	0.205494	-0.262846	2.23128	1.95066	2.03127
CD19	0.113894	-0.133304	0.00879332	1.20865	1.11724	1.03145
CD1D	-0.421549	0.33353	-0.0097202	1.53429	1.4133	1.48383
CD2	-0.236086	0.0123815	0.191986	2.15941	2.03217	1.49438
CD209	0.229096	0.0714042	-0.363715	2.53081	2.29846	2.22882
CD226	0.246907	-0.260267	-0.0314945	0.753575	0.797087	1.27967
CD248	-0.337174	-0.312098	0.488454	1.38868	1.69791	1.22195
CD300C	-0.145444	0.0970081	0.037517	1.42943	1.63033	1.31898
CD300LF	-0.103162	0.142276	-0.0508539	0.977929	1.02991	1.00477
CD38	-0.0957066	0.0521076	0.0390089	1.27268	1.23539	1.27764
CD3D	-0.34219	0.0130145	0.265552	1.10109	1.39959	1.04103
CD4	-0.206531	-0.0230473	0.200668	1.30492	1.5858	1.40125
CD40	-0.148546	-0.148546	0.257833	0.843196	1.36358	1.21337
CD5	0.183814	0.0475782	-0.267794	1.62164	1.60142	1.8553
CD52	-0.241157	0.193919	0.0144508	1.56877	1.44847	1.45366
CD59	-0.0892621	-0.00112525	0.0851204	1.22622	1.17103	1.26038
CD6	-0.20872	0.0895842	0.0984626	1.6047	1.89523	1.78007
CD70	-0.135435	0.184302	-0.0689415	1.06609	1.1182	0.971296
CD72	-0.197686	0.404485	-0.313951	1.14435	1.14157	0.92469
CD79B	-0.326867	-0.057196	0.312205	2.19483	2.10962	1.73397
CD82	-0.046746	0.0460665	-0.000813321	1.79335	1.9484	1.71709
CD84	0.143358	-0.241342	0.0697972	1.16872	1.33197	1.36918
CD86	-0.0515565	-0.05035	0.096806	1.94332	1.78607	1.92328
CD8A	-0.974875	0.310125	0.323545	2.07133	1.42165	2.1765
CD9	-0.303762	0.0620201	0.196527	1.68031	1.68698	1.52829
CDA	-0.0224717	0.240287	-0.261487	1.2165	1.2303	1.23919
CDC14B	-0.0327862	-0.0433736	0.073253	1.0218	1.24944	1.1372
CDC42BPG	0.153672	-0.00904974	-0.161886	1.00822	1.19589	0.924976
CDCP1	0.476743	-0.213317	-0.423042	1.63865	2.26463	2.48364
CDH1	-0.0113915	0.440992	-0.620761	2.19323	2.52523	2.47036
CDH23	-0.0411	0.375073	-0.451699	1.74942	1.39555	1.2573
CDH3	0.0252763	-0.16665	0.126201	1.13983	1.0116	0.848616
CDHR1	0.324481	-0.477912	0.0423224	0.731326	1.45372	0.58331
CDHR4	0.333516	-0.0972867	-0.312706	1.08202	1.56534	1.2911
CDK18	0.0879311	0.147996	-0.270337	1.31228	1.90566	1.3187
CDKN1C	-0.0938766	-0.109101	0.18375	1.06425	1.41484	1.04733
CDKN2B	0.162634	0.161797	-0.392153	1.19573	0.908355	0.870968
CECR1	0.0540445	-0.016174	-0.0395223	1.16881	1.2645	1.1902
CECR2	0.167036	-0.32149	0.107028	1.49104	1.51315	1.77378
CEL	-0.0377304	0.0928965	-0.0599394	1.17356	1.43747	1.01047
CELA1	-0.0994742	0.204702	-0.129452	1.21781	1.12773	1.15136
CERS4	-0.116464	-0.323143	0.354145	1.0636	1.37283	0.896869
CES3	-0.0673618	-0.106651	0.15947	0.957186	1.50688	1.27246
CFH	-0.188862	0.080809	0.0909779	1.53748	1.66785	1.98223
CFP	-0.320869	-0.0535112	0.305474	1.3855	1.57856	1.47709
CHDH	-0.130679	0.254046	-0.161569	1.31186	1.56968	1.53025
CHGB	0.270521	-0.640999	0.204752	1.36589	1.21333	0.692811
CHIT1	-0.0318835	-0.138162	0.154689	0.88852	1.27949	1.57022
CHN2	-0.0145153	-0.00770889	0.0219628	1.01617	1.0381	1.14617
CHRFAM7A	-0.464798	-0.0824419	0.412478	0.706347	1.23549	1.14255
CHRNA6	0	0	0	0.991742	1.79483	2.04982
CIB3	-0.320845	0.197558	0.0740168	0.932599	1.32338	0.793516
CIDEC	-0.427309	0.169546	0.178425	1.68467	2.26777	1.62788
CKM	0.290144	0.0166687	-0.385305	1.18864	1.6458	1.66451
CLDN10	0.053938	-0.325031	0.218625	1.46405	0.937884	1.27519
CLDN23	-0.0702914	-0.0188083	0.0847537	1.10076	1.22659	0.648706
CLDN7	-0.271195	0.153605	0.0827322	1.62191	1.91346	1.45776
CLEC12A	-0.0712276	0.032475	0.0361967	1.08893	1.06543	1.07356
CLEC12B	0.207154	0.0569619	-0.312369	1.37016	1.69235	1.47473
CLEC1A	-0.319596	0.437572	-0.244031	1.08557	1.32463	1.02691
CLEC1B	0.676792	-0.520014	-0.506242	1.26413	1.44387	1.38333
CLEC3B	-0.181224	0.239113	-0.0926808	1.81543	1.5813	1.75128
CLEC4D	-0.248869	-0.0325997	0.239749	1.49581	1.41543	1.43136
CLEC4F	-0.283215	-0.283215	0.439873	1.44218	0.662509	1.87208
CLEC4G	-0.418586	-0.03623	0.352354	0.834858	1.33566	1.18876
CLEC4M	-0.105958	0.0416045	0.0587379	1.94798	1.86151	1.9538
CLEC6A	-0.218681	-0.154256	0.312727	1.25676	1.48161	1.5033
CLEC7A	0.131274	-0.444586	0.226439	3.3481	3.40354	3.29762
CLECL1	0.114958	-0.0673737	-0.0548677	1.02571	0.945562	0.578135
CLSTN3	0.14207	-0.151126	-0.00583276	2.04046	2.41723	1.9213
CLU	-0.0542577	0.123302	-0.07752	1.27859	1.04031	1.06432
CMAHP	0.0337621	-0.0446097	0.00973385	1.59896	1.69041	1.63672
CMPK2	-0.18888	0.054857	0.116308	1.3505	1.35259	1.33611
CNFN	-0.403444	0.312563	0.00293561	1.90525	1.51436	1.12479
CNGA4	-0.10797	0.458428	-0.518569	1.74386	1.53774	1.19043
CNR2	0.241951	-0.0347702	-0.249441	1.17233	1.39912	1.12986
CNTN1	-0.0517027	-0.340273	0.316506	1.82165	1.53935	2.12501
COCH	-0.0493419	-0.0481471	0.0928099	1.45481	1.39947	1.36753
COL12A1	0.179395	-0.238285	0.0283403	1.4473	1.75873	1.4778
COL14A1	-0.161003	0.0197345	0.12674	0.725551	0.758048	1.20597
COL15A1	-0.0437145	0.0567701	-0.0149198	1.0256	0.996609	1.0287
COL1A1	0.0607285	-0.227842	0.141559	0.153743	1.80251	1.56333
COL1A2	0.0798853	0.14431	-0.255212	2.44731	2.46703	2.79678
COL4A1	-0.309483	0.0427047	0.217883	1.15744	1.535	1.61515
COL6A1	0.142337	0.113111	-0.29557	1.36386	1.59393	1.04559
COL7A1	-0.0356619	-0.159325	0.17501	1.16543	0.879545	0.964583
COL9A2	0.0548418	-0.0430649	-0.0135323	1.77872	1.88957	1.66743
COL9A3	-0.00286132	0.0987902	-0.102982	1.47734	1.64382	1.26364
COLEC12	0.257451	0.0601958	-0.392084	0.873529	0.643237	1.14053
CPA6	0.0376988	0.352003	-0.520369	0.848278	1.34908	1.14126
CPNE9	0.18823	0.0950744	-0.33549	1.21541	1.25885	1.19688
CPS1	-0.313434	-0.186136	0.39651	1.41384	1.34023	1.3175
CPXM1	0.0415006	0.0724068	-0.121319	1.72068	2.04434	1.82194
CR1	0.156909	-0.147506	-0.0257725	1.38795	1.47395	1.41354
CR2	-0.283215	-0.283215	0.439873	1.44218	0.876978	1.7666
CREB3L1	0.0256582	-0.067497	0.0395088	1.05284	1.25139	0.317036
CREB3L3	-0.018244	0.00683172	0.0112374	4.93448	5.26888	5.06512
CRIP1	-0.137134	0.0885288	0.0389855	1.92345	2.07213	1.95987
CRISPLD1	-0.0139255	0.0486767	-0.0360964	1.32187	1.29573	1.22263
CRISPLD2	-0.000611154	0.0664989	-0.0690717	1.20606	1.30253	1.06468
CRTAM	0.369099	-0.546656	0.0340021	0.776762	0.846201	1.6423
CRYBB1	-0.00476797	-0.0979232	0.0961571	1.34403	1.32725	1.54195
CSF1	-0.0141099	0.383174	-0.503232	1.36165	1.32618	1.087
CSF1R	-0.0536757	0.0213053	0.0308929	1.42104	1.47282	1.49793
CSGALNACT1	0.0781868	-0.194585	0.0982655	0.931514	0.798679	1.3522
CSRP3	0.409596	-0.00281136	-0.569966	2.16408	1.87215	2.22838
CTHRC1	0.0149623	0.0256532	-0.0415144	1.09398	1.22334	0.6306
CTSE	-0.811571	0.162182	0.390955	1.83746	1.10623	1.62052
CTSF	0.0218927	0.0534517	-0.0786176	1.60798	1.80545	1.68837
CTSL2	-0.175049	0.0984053	0.0616702	1.60787	1.31177	1.41522
CTSW	0.102334	-0.0214979	-0.0873006	1.03101	1.20974	0.964571
CUEDC1	0.00176544	0.0175243	-0.0195293	1.39884	1.58515	1.19102
CXCL10	0.204666	-0.920544	0.39974	1.15003	1.62882	0.906244
CXCL11	-0.32727	-0.230439	0.43358	1.74225	1.52306	1.68449
CXCL16	-0.201826	0.392144	-0.289459	0.304842	1.33526	1.1814
CXCR1	-0.148546	-0.148546	0.257833	1.83905	0.239608	1.37969
CXCR2	-0.062034	0.0780366	-0.019599	1.27143	1.10265	1.34914
CXCR2P1	0.0661494	-0.0241811	-0.0443856	1.35176	1.41827	1.3947
CXCR3	-0.313542	0.349558	-0.118468	2.86904	2.92791	2.60565
CXCR5	0.226815	0.277883	-0.69587	1.61282	1.6299	0.832361
CYB5R2	-0.790021	0.491116	0.0230893	0.987229	0.903246	0.874947
CYGB	-0.276428	0.276975	-0.0548185	1.66583	1.45522	1.43341
CYP11A1	0	0	0	1.72539	1.51213	1.52823
CYP19A1	0.0697719	0.11033	-0.199298	4.37828	4.30215	4.44018
CYP1A1	0.24003	-0.136868	-0.136868	0.593495	1.02332	1.79915
CYP2A6	-0.148546	-0.148546	0.257833	0.843196	0.545163	1.52879
CYP2F1	0	0	0	1.40471	0.693709	0.703195
CYP4F3	0.0637201	-0.523404	0.332409	0.984124	1.09162	1.06834
CYS1	0.0684953	-0.20498	0.116134	1.96422	0.739913	1.20551
CYSLTR2	-0.258658	0.200811	0.0211825	1.67883	1.99285	2.36436
CYTH4	-0.103612	0.0479385	0.0503463	1.64299	1.70068	1.4317
CYTIP	-0.00521783	0.0122392	-0.00710032	1.09073	0.967992	1.06377
DAB2	0.00935078	-0.287603	0.231722	0.776654	1.37273	0.935058
DACT1	0.291182	-0.310541	-0.0439158	1.54463	1.29922	1.22703
DAPK1	-0.0404568	-0.101492	0.1317	1.59058	1.28294	1.42646
DBN1	0.00650762	0.00215054	-0.00870064	1.0881	1.27199	1.08423
DBNDD1	-0.0859143	0.3737	-0.391869	1.17957	1.8362	1.40776
DCDC5	0.0684953	-0.20498	0.116134	0.384789	1.42415	1.32906
DCLK2	-0.259515	0.010157	0.211094	1.02719	1.05188	0.973092
DDIT4L	-0.0690096	0.142247	-0.0845403	1.91118	1.81626	1.84604
DDO	0	0	0	1.40471	1.16019	0.703195
DDR1	-0.281617	0.120357	0.124762	1.58082	2.28872	2.30931
DEGS2	0.225616	0.0189371	-0.29069	1.70452	1.87327	1.73502
DENND2C	-0.127772	-0.486273	0.455112	1.53737	1.33208	1.46933
DES	-0.510714	0.363697	0.0163628	2.99458	2.64924	3.16937
DFNA5	-0.182762	0.0431127	0.122541	1.67959	1.75206	1.54751
DFNB31	0.033043	0.117975	-0.165497	1.97807	1.88913	1.0832
DHRS1	-0.135574	0.227006	-0.12141	1.08719	0.995661	1.08736
DHRS3	0.24856	0.149787	-0.509279	1.25651	1.67127	1.91353
DHRS4L1	-0.0616049	0.327603	-0.345792	0.489746	0.880646	1.14952
DHRS9	-0.371212	0.240344	0.064321	1.16463	1.02163	1.22766
DHX58	0.00963659	-0.0277444	0.0177014	1.68382	1.45966	1.32764
DKFZp434J0226	-0.283215	-0.283215	0.439873	0.929736	1.85294	1.6528
DKFZp761E198	-0.0460232	0.0417625	0.00292104	1.45134	1.49252	1.25968
DKK2	-0.00921714	0.136405	-0.140498	1.67962	1.79018	1.7523
DLG3	0.0697719	0.11033	-0.199298	1.11971	0.554516	1.33034
DNAH10	0.145295	-0.233826	0.0616607	1.90874	2.18297	2.19791
DNAH3	-0.238496	-0.21342	0.367238	0.958548	1.41571	0.746525
DNAH8	0.186416	-0.173606	-0.0358702	2.09014	2.08224	2.23066
DNAJB2	-0.0692279	0.150868	-0.0944728	0.989287	1.12817	0.976698
DNAJC5B	0.163264	-0.163602	-0.0183093	1.54068	1.53173	1.6209
DNASE2	-0.0830401	0.129552	-0.0559209	2.36146	2.39941	2.4156
DOK4	-0.234927	0.0500245	0.15703	1.69345	1.9386	2.01072
DPEP2	-0.0148087	0.1443	-0.143982	2.06675	2.29007	1.96274
DPP4	0.0329939	0.157757	-0.215386	1.63103	1.71643	1.88458
DSP	0.25962	-0.290683	-0.0213331	0.754289	1.09503	1.11932
DTX3	-0.289104	0.417601	-0.241465	1.60662	1.36122	1.54914
DUSP10	-0.0153606	0.0390078	-0.0244671	1.14222	1.17611	1.13961
EBF4	0.104316	-0.272582	0.133798	1.13213	1.23955	1.25565
EBI3	-0.141473	-0.0659343	0.186603	2.02106	1.80281	1.64363
ECHDC3	0	0	0	1.57394	0.693709	0.394024
ECM1	0.046858	0.0343527	-0.0848386	1.49558	1.64098	1.46248
ECSCR	-0.259515	0.010157	0.211094	1.21939	1.83581	1.74287
EEF1DP3	-0.462151	0.177368	0.193177	0.886644	0.648834	1.19961
EFCAB4A	0.129543	0.291343	-0.551578	1.83153	2.19347	1.74046
EFCAB5	0.141212	-0.303678	0.120331	0.939632	1.27045	1.18617
EFEMP2	0.0204386	-0.174623	0.137154	1.01391	1.19014	0.886708
EFHD1	-0.148546	-0.148546	0.257833	0.581817	1.01165	1.21337
EGF	-0.174635	-0.17535	0.296846	1.24449	0.576499	0.876848
EGR2	0.369099	-0.546656	0.0340021	1.36006	1.18753	1.48346
EHD2	-0.0112828	0.00199417	0.00921372	1.45372	1.43241	1.20287
EIF2AK2	0.123921	-0.181688	0.0407345	0.976874	1.08647	1.11269
EMID1	0.0314145	-0.295346	0.217987	2.02617	1.8875	1.88538
EML6	-0.15595	-0.545176	0.502994	0.969488	0.931048	1.05032
EMP1	-0.113842	0.113843	-0.00901721	1.53359	1.43373	1.49097
EMR1	-0.166044	0.555436	-0.645878	1.53454	2.13152	2.23578
EMR2	-0.0256357	-0.0976145	0.11508	1.04974	0.945955	0.945379
EMR4P	0.238251	-0.167758	-0.104367	1.62039	1.75108	1.69202
ENPP2	-0.06705	-0.0219208	0.0847331	3.39273	3.39865	3.40762
ENPP3	0.136199	0.417785	-0.823374	2.30603	1.81801	2.36577
EPAS1	0.243682	-0.478696	0.135356	1.03904	1.53173	1.09838
EPB41L1	-0.418586	-0.03623	0.352354	0.473079	1.43788	1.45988
EPHB6	0.191562	-0.259611	0.0323652	1.29315	1.54659	1.32663
EPS8L2	0.0689372	0.210771	-0.333244	0.989179	0.75558	1.22253
EPSTI1	0.0359337	-0.0245747	-0.0120687	1.19955	1.34732	1.69968
ERBB2	0.0789093	-0.330206	0.199572	0.946856	1.38309	1.02672
ERC2	0	0	0	0.991742	1.66039	0.957662
ERMN	-0.0478003	-0.173172	0.196229	1.55868	1.70645	1.49862
ESRP1	-0.131477	0.0840691	0.038577	1.46035	1.4843	1.67244
ETNK2	0.105926	0.131002	-0.270972	1.45442	1.52386	1.66505
EVPL	0	0	0	0.410914	0.945724	0.957662
EXD3	-0.030873	0.210184	-0.210335	1.37454	1.40363	0.914115
F2RL3	0.24003	-0.136868	-0.136868	1.43707	1.52353	0.820794
F5	-0.560083	-0.311616	0.600268	0.795104	0.949673	1.10677
FABP4	-0.708742	0.570843	-0.147593	2.48985	2.24817	2.25763
FAIM3	0.242325	-0.0339133	-0.250963	1.8745	2.14468	1.47625
FAM100B	-0.111706	0.154936	-0.0571891	1.02775	1.13292	0.959647
FAM111A	0.0635606	-0.0539466	-0.0120814	1.10232	1.16747	1.12083
FAM111B	-0.22782	-0.1299	0.301214	1.06547	1.326	1.21158
FAM113B	-0.0646424	0.223401	-0.190445	1.43955	1.5411	1.1524
FAM114A1	0.194922	0.018584	-0.247469	1.21219	1.18132	1.21125
FAM116B	-0.123318	0.0568235	0.0590137	1.1069	1.1503	1.18825
FAM117A	-0.0220698	0.0457563	-0.0247997	1.06757	1.22196	1.03638
FAM122C	0.113955	-0.215616	0.0794717	1.09702	0.872293	1.00628
FAM134B	-0.321571	0.292516	-0.0364851	1.33391	1.38677	1.39445
FAM159A	-0.131203	0.207905	-0.101722	2.14093	1.81767	1.02013
FAM179A	0.229347	-0.0498438	-0.214819	2.08013	2.19193	2.12737
FAM18B2	0.108846	0.0371209	-0.159121	1.07577	1.1487	1.08201
FAM198B	-0.0285742	-0.079676	0.102109	1.65535	1.5236	1.51213
FAM46C	0.0142367	-0.111136	0.0898019	1.34554	1.8205	0.950086
FAM57B	0.0465768	0.316248	-0.469729	1.77292	1.61722	0.0815537
FAM66B	-0.508543	-0.0290215	0.397237	1.11136	0.789926	0.744527
FAM66C	-0.0925206	-0.0075888	0.0940517	1.19006	1.10411	0.816467
FAM70A	0.134524	0.0808418	-0.243602	1.74432	1.74947	1.90381
FAP	0.125324	-0.137507	0.000228937	1.28454	1.04438	1.22256
FAR2	-0.0108649	-0.0677795	0.0750497	1.11698	0.962168	1.08532
FBP1	-0.129861	-0.0305165	0.146669	1.58802	1.18151	1.22882
FBXO15	-0.0727808	-0.287261	0.298353	1.28535	0.877014	1.14118
FBXO32	0.132049	-0.20353	0.050645	1.32039	1.53763	1.44862
FBXO44	0.129774	-0.112808	-0.0275408	1.27683	0.776145	1.37761
FCAMR	-0.14841	0.167916	-0.0375301	1.31902	1.13092	1.17465
FCER1A	0.0123142	0.107379	-0.129483	1.13939	0.954193	0.675225
FCGR1B	-0.133528	0.0083064	0.114535	1.57772	1.20531	1.28615
FCGR1C	0.38453	-0.309596	-0.17186	1.77739	1.83781	1.64881
FCGR2A	-0.110592	0.16696	-0.0723285	1.57275	1.56561	1.61994
FCGR2C	0.0752206	-0.0460365	-0.0322644	1.73811	1.80516	1.64058
FCGR3A	-0.569814	0.210541	0.22549	1.06963	1.47346	1.0511
FCRLA	0.295822	0.295107	-0.874508	0.783142	0.765817	1.01674
FERMT2	-0.0436802	-0.203614	0.215927	1.03203	0.483027	1.48687
FES	-0.14783	0.286777	-0.18856	1.20101	1.37332	1.49642
FGD4	0.208832	-0.265659	0.0178211	1.46747	1.29532	1.65758
FGF5	-0.214655	0.648546	-0.809296	1.11665	1.37125	1.33177
FGFR3	-0.0949954	-0.119062	0.192748	2.24967	2.02303	2.02226
FGR	0.133781	-0.104845	-0.0395922	2.27172	2.33186	2.19687
FHL1	-0.131783	0.101322	0.0208281	1.24491	1.11987	1.12038
FIBCD1	-0.146792	0.255182	-0.146792	1.42715	1.0134	0.556404
FILIP1L	0.0767104	-0.178423	0.0864046	1.50677	1.37782	1.67594
FKBP10	0	0	0	0.410914	1.79483	0.394024
FLG	0.0822461	-0.48599	0.295521	1.30717	1.5913	1.74599
FLJ27352	0.255484	-0.314979	0.00346023	1.01799	1.12251	0.84729
FLJ32063	0.104316	-0.272582	0.133798	1.13213	0.673142	1.08934
FLJ35776	-1.02507	-0.000437848	0.593515	1.55765	1.70142	1.44537
FLJ43826	-0.403444	0.312563	0.00293561	1.1705	2.00854	1.64637
FLRT3	0.263744	-0.958657	0.361627	0.638762	1.19158	1.05112
FLT3LG	0.0547923	0.189983	-0.285354	0.905774	1.37579	0.791965
FMN1	0.307027	-0.386138	-0.00336695	1.2165	1.1707	1.22872
FMO4	0.0711145	-0.120915	0.0424588	1.11944	1.3063	1.17114
FN1	0.15919	-0.244027	0.055133	1.1975	1.37022	1.28707
FPR2	-0.445741	0.246101	0.110758	1.85679	1.55401	1.77483
FPR3	-0.381527	-0.036733	0.330576	0.729348	1.22618	1.07996
FRK	-0.174235	0.0742323	0.0853728	1.61629	1.26242	0.847371
FST	-0.215998	0.426721	-0.331201	0.955147	0.602432	1.13051
FSTL1	-0.0841605	-0.0786877	0.150232	1.24254	1.1443	1.26438
FXYD6	0.0249979	-0.111836	0.080128	1.73446	1.82719	1.59484
FYB	0.102283	-0.16673	0.0505629	1.09093	1.15934	1.23724
GABARAPL1	-0.00720937	0.0367473	-0.0303448	1.53316	1.54304	1.41594
GABRR1	0.326314	0.0316494	-0.46591	1.77595	1.7335	1.19571
GATA6	0.431446	-0.0892653	-0.491239	0.721712	1.42656	1.03699
GATS	-0.00201957	-0.00760424	0.00957058	1.17423	1.26069	1.32846
GATSL3	-0.106555	-0.0421305	0.137474	0.97731	1.06905	1.43987
GBP1	-0.280018	0.435989	-0.280018	0.932934	1.06685	1.24821
GBP1P1	-0.404912	-0.0029386	0.318175	1.90378	1.73125	1.53111
GBP2	-0.0866903	0.0315532	0.0513128	1.87205	1.72507	1.96249
GBP3	0.00511567	-0.0584583	0.0512441	1.12524	1.18363	1.22452
GBP4	0.18768	-0.432742	0.163779	3.5988	3.62284	3.74433
GBP5	0.0842038	-0.183207	0.0829132	2.12612	2.11717	2.0868
GCET2	-0.238496	-0.21342	0.367238	0.597557	1.17944	1.32062
GCOM1	-0.000857951	0.552546	-0.905297	2.32574	1.81509	1.83755
GEM	0.125819	-0.012696	-0.124008	1.12769	0.438839	1.17275
GGT1	0.294138	-0.29621	-0.059707	2.78082	2.62949	2.53833
GGT7	0.0884669	0.0354983	-0.133132	1.19259	1.4536	1.32236
GHRL	-0.0199359	0.166245	-0.165549	1.02964	0.555654	1.27714
GIMAP1	-0.0510308	-0.149804	0.180633	1.11707	0.604201	0.981735
GIMAP6	-0.183511	0.166227	-0.00386791	1.2528	1.16043	1.14166
GIPR	0.351163	0.0711927	-0.56955	1.19611	1.73406	0.938032
GJB2	-0.0839195	0.238748	-0.190107	2.92086	3.06937	2.85857
GJB6	-0.0668955	0.278835	-0.26518	2.75702	2.39348	2.97424
GJD3	0.00375608	0.113635	-0.12746	1.36473	1.34515	1.11543
GLDN	0.263556	0.103622	-0.463751	2.1742	2.09183	2.16957
GLIS3	-0.369019	-0.0707143	0.348827	1.05829	1.73493	1.68953
GLRB	0.260693	-0.287084	-0.0256334	0.988491	1.07941	1.1676
GLYATL1	0.24003	-0.136868	-0.136868	1.07608	0.808856	1.54047
GLYATL2	0.175067	-0.098408	-0.0940023	2.07079	1.7337	1.93171
GMPR	0.0308855	0.0507798	-0.0853799	1.51301	1.57572	1.08643
GNG12	0.0869217	-0.179449	0.0770494	1.08597	1.19978	1.1007
GNLY	-0.268526	0.215767	0.0122279	2.59676	2.6456	2.61486
GOLGA2P5	0.268814	-0.207085	-0.106409	1.07662	1.26147	1.16721
GOLGA8A	0.105627	0.247461	-0.440415	1.02587	1.23574	1.01488
GP6	0.264146	0.120204	-0.489672	1.34635	1.06313	0.395188
GPA33	-0.26905	0.373669	-0.193485	2.89989	2.2795	2.33279
GPNMB	0.0468946	0.158722	-0.23334	1.15595	1.17143	1.26303
GPR114	-0.0757831	0.114491	-0.0460572	2.2276	2.38655	2.21881
GPR137C	0.433228	-0.0334457	-0.57204	2.02557	1.56668	1.85591
GPR153	-0.00729901	0.291326	-0.356084	0.971284	1.55504	0.904883
GPR174	0.466342	-0.196964	-0.422725	1.74234	2.16671	1.52268
GPR18	-0.107823	0.0503458	0.0517192	1.278	1.13698	1.2762
GPR183	-0.0914743	0.0445563	0.0427437	1.06013	1.06834	1.07371
GPR19	0.0866227	0.153614	-0.276195	1.15458	0.996892	1.1826
GPR20	0.753158	-0.291429	-1.00744	1.39416	1.31834	1.33816
GPR34	-0.200173	0.0454512	0.134284	2.44066	2.3348	2.5134
GPR55	-0.0927069	-0.0825564	0.160734	1.30314	1.31562	1.33972
GPR64	-0.350006	0.0472784	0.241359	1.45273	1.75112	1.62599
GPR68	-0.102514	0.238976	-0.170659	1.88294	1.67673	1.79002
GPR97	-0.0982654	-0.280597	0.313355	3.10478	3.19699	3.00924
GPR98	0.260501	0.214217	-0.639284	1.47892	2.08296	1.57428
GPRC5B	-0.191393	0.14153	0.0302174	1.66849	0.960477	1.37728
GPRC5C	0.0986144	-0.0249499	-0.079477	1.60305	1.7425	1.66778
GPRIN3	0.357179	-0.545691	0.0482616	1.24163	1.42453	1.29992
GPSM1	0.174717	-0.172537	-0.0233048	0.942143	1.39928	0.503451
GRAMD1C	0.133321	0.184389	-0.382985	1.19823	1.99003	2.40683
GRID2IP	-0.234685	0.580774	-0.611583	0.601368	1.30622	1.20089
GRIN2C	0.186898	-0.0488074	-0.16012	1.03507	1.82615	1.18694
GRIN2D	0.432217	-0.252217	-0.302067	0.835751	1.53951	0.577066
GRK1	-0.250928	0.104277	0.117281	1.52632	1.111	1.13229
GSDMC	-0.280018	0.435989	-0.280018	0.711725	1.23211	1.24821
GSN	-0.0334431	0.0808972	-0.0510422	1.5442	1.58492	1.53974
GSTM2	-0.164014	0.067792	0.0831796	1.25985	1.39771	1.34035
GTF2IRD2	0.0997492	0.0922413	-0.213591	1.02015	1.12765	1.23688
GUSBP5	-0.604746	0.336464	0.110703	0.750441	0.7549	1.12572
GVINP1	0.370184	-0.422456	-0.0568978	1.61138	1.71024	1.81252
GYG2	0.21184	-0.126997	-0.110759	1.41001	1.42938	1.27609
GZMA	-0.104484	0.432996	-0.474276	2.19619	2.00097	2.21667
GZMM	0	0	0	0.991742	0.693709	0.957662
H1FNT	0	0	0	0.730363	0.945724	0.703195
HAAO	-0.0437485	0.105571	-0.0680159	1.13215	1.19266	1.19264
HAVCR2	-0.218449	0.0895476	0.106314	1.69666	1.74107	1.76523
HBEGF	-0.256569	0.0167386	0.203206	0.964808	1.2133	0.99764
HCP5	0.0968116	-0.566495	0.328075	1.00632	0.881721	0.864977
HDAC11	0.204363	-0.0182103	-0.216978	0.798793	1.09378	0.967859
HDC	-0.275115	0.364404	-0.17419	0.706311	1.39081	1.44091
HECW2	-0.0876764	0.00422072	0.0786549	1.7715	1.86642	1.7048
HEPHL1	0	0	0	0.730363	0.693709	1.36192
HERC6	-0.106501	0.135405	-0.0398423	1.3092	1.32538	1.36841
HFM1	0.452629	-0.451214	-0.151937	1.30596	1.0709	1.38043
HK3	0.303442	0.102797	-0.531028	1.93988	1.75304	1.6295
HLA-DMA	-0.285103	0.31923	-0.102136	1.61027	1.50175	1.35212
HLA-DMB	-0.0380546	0.235092	-0.236077	1.11783	1.43268	1.17448
HLA-DOA	0.542472	-0.591214	-0.184835	1.71748	0.755653	1.08612
HLA-DPA1	-0.462352	0.38227	-0.0427435	1.74311	1.59577	1.88323
HLA-DPB1	-0.0496441	0.117967	-0.0760961	1.52568	1.37308	1.3885
HLA-DQB1	0.0159723	-0.2274	0.182304	1.53067	1.39487	1.37034
HLA-DRA	-0.222003	0.194108	-0.00200724	1.20536	1.11378	1.20731
HLA-DRB1	-0.249588	0.129672	0.090608	1.10538	1.1109	1.10482
HLA-DRB5	-0.199647	0.196026	-0.0237133	1.13004	1.23333	1.09725
HLA-DRB6	-0.0811736	0.240506	-0.195443	1.30869	1.32439	1.08795
HMCN1	0.275795	-0.511161	0.121256	1.90061	1.91285	2.12126
HMOX1	0.10028	0.386104	-0.686966	1.39554	1.5179	1.0257
HOPX	-0.203657	0.0574186	0.125719	1.99167	2.02335	2.17267
HP	-0.0935946	0.15405	-0.0738088	2.22937	2.0704	2.14511
HPGD	-0.16092	0.481799	-0.496018	1.50687	1.16479	0.953441
HPSE	-0.176143	0.135004	0.02409	1.21569	1.22039	1.19663
HRH4	0.0681909	0.0313194	-0.105237	1.28574	1.31338	1.21752
HRNR	-0.0510308	-0.149804	0.180633	2.29394	1.95188	2.60922
HSD17B14	-0.511894	-0.242222	0.539289	1.21445	1.13576	0.911015
HSH2D	0.13257	0.0447899	-0.197232	1.2476	1.31888	1.26716
HSPA7	-0.0505794	0.142472	-0.103679	1.43723	0.933764	1.05977
HSPG2	0.558935	-0.556141	-0.240077	1.12592	2.00639	0.817728
HTRA1	-0.323296	0.47903	-0.309446	1.65732	2.10389	2.11165
HTRA3	0.0500503	0.141263	-0.214526	1.25851	1.43439	1.16276
HTRA4	-0.0249311	-0.0489974	0.07111	2.34141	2.66007	2.1165
HYDIN	0.0806456	-0.219377	0.115796	2.05554	1.76246	2.08069
ICAM1	0.370819	-0.207316	-0.250224	0.852188	1.21888	0.996531
ICAM2	-0.136132	0.166615	-0.0474842	1.12158	1.00924	0.832989
ICAM3	-0.0517358	0.136389	-0.0953046	1.01839	1.14459	1.02721
ID1	-0.468826	0.224113	0.149765	1.90834	1.93103	1.63539
ID2	-0.0590529	0.12281	-0.0720995	1.72368	1.76655	1.65927
ID2B	-0.510714	0.363697	0.0163628	1.60701	1.22582	1.61438
IER3	-0.014996	0.186857	-0.197502	1.36949	1.43511	1.37841
IFI16	-0.0278127	-0.0772622	0.0992803	0.967084	1.05714	1.03601
IFI35	-0.224256	0.262351	-0.0823289	1.48209	1.38517	1.34463
IFI44	-0.105423	0.248994	-0.181004	1.37391	0.929764	0.801487
IFI44L	-0.439681	0.340674	-0.00526976	0.723933	1.11483	1.13709
IFI6	0.0138296	-0.0711956	0.0545277	1.4599	1.08108	1.01704
IFIT2	-0.0737375	-0.143574	0.194784	1.11231	0.981747	1.17979
IFIT3	0.162799	-0.28641	0.0848847	0.92041	0.98395	1.08581
IFIT5	-0.453121	0.139136	0.224403	0.923306	0.894656	1.19066
IFITM3	-0.053562	0.366775	-0.420861	0.979014	0.898865	0.919841
IGFALS	0.0444607	-0.162218	0.104407	1.43047	0.916605	0.799114
IGFBP4	-0.13315	0.180309	-0.0663743	2.25348	2.21915	2.08223
IGSF3	0.0451854	-0.188832	0.125477	1.09147	1.1304	0.961885
IL12RB1	0.200589	-0.289124	0.0460495	1.96669	2.27594	2.20983
IL17RE	-0.0417803	0.0142802	0.0265835	1.77826	1.74151	1.66526
IL18	-0.655401	0.0111402	0.440792	2.44494	2.39781	2.30753
IL19	0.101775	-0.0581588	-0.0492804	1.27678	1.74748	0.780556
IL1R1	-0.0666183	-0.0427581	0.103436	1.7441	1.92981	2.30803
IL21R	0.0380586	0.0406039	-0.0820345	1.20838	1.21201	1.04978
IL23A	-0.250121	0.124501	0.0963205	0.76724	1.17008	0.992239
IL24	-0.148546	-0.148546	0.257833	1.83905	1.01165	1.78747
IL2RA	0.443387	-0.288326	-0.283921	1.61839	1.80303	1.74179
IL2RB	0.415481	-0.0777728	-0.476464	1.60949	1.9732	1.65488
IL31RA	0.117668	-0.331989	0.164245	1.0112	1.00975	1.03015
IL33	0.178393	-0.55332	0.247232	1.2541	2.11668	1.5584
IL4I1	0.139787	-0.132986	-0.0198785	1.21527	1.66962	1.06759
IL7R	0.0218985	-0.233159	0.181339	1.82546	1.8004	1.93732
IL8	-0.116913	0.0525639	0.0576024	1.33295	1.29121	1.31208
ILDR1	-0.0197211	-0.396619	0.326469	1.32877	2.17372	1.75867
IMPG2	0.158718	-1.00769	0.471306	1.76371	1.17993	2.07084
INADL	0.175067	-0.098408	-0.0940023	1.07356	0.846485	2.09054
INHBA	0.102459	-0.154801	0.0400393	1.13254	1.13285	1.19437
IP6K3	0	0	0	2.57117	1.79483	2.51369
IPCEF1	0.0970989	-0.218779	0.0990759	1.01986	0.967975	1.08733
IQCD	-0.0114187	-0.0122881	0.0234185	1.23	1.2823	1.18458
IQSEC2	-0.0880027	0.301651	-0.274701	1.21928	1.36084	1.37643
IQSEC3	0.0406923	-0.152553	0.0999493	1.91358	2.38853	1.79951
IRAK2	0.0176555	-0.0833714	0.0618972	1.18371	1.17254	1.23371
IRF6	0.319786	0.0361081	-0.460945	1.65025	1.53689	1.53569
IRF7	0.156426	0.0461505	-0.229431	1.42853	1.48588	1.29963
IRX6	0.167838	-0.099573	-0.0841854	1.66683	1.37911	0.996772
ITGA1	0.179087	-0.123501	-0.0741901	1.2655	1.30775	1.33985
ITGA11	0.0865028	0.50684	-0.951003	1.18609	1.68509	0.481201
ITGA2B	0.320647	-0.00611378	-0.404804	0.893613	1.63202	1.27824
ITGA3	-0.205222	0.144256	0.0390459	1.012	1.46129	1.2757
ITGA6	0.274191	-0.0907085	-0.231714	1.34959	1.56153	1.35589
ITGAM	-0.062122	-0.0653616	0.119609	2.59856	2.37736	2.52584
ITGAX	0.348218	0.0507033	-0.532736	2.05893	2.49707	1.73636
ITGB4	0.102361	0.0668682	-0.186015	1.26589	1.95364	1.42974
ITGB5	-0.00506958	-0.056289	0.059041	1.55991	2.00645	1.84156
ITIH1	0.290144	0.0166687	-0.385305	1.0194	0.961562	1.14293
ITLN1	0	0	0	1.21295	1.16019	0.957662
ITPK1-AS1	0.0790616	-0.0463106	-0.0361417	1.25021	0.897491	1.10693
ITPKA	-0.24549	0.0531082	0.162175	1.1088	1.13275	0.757016
IZUMO1	0.545787	-0.376898	-0.376898	1.72586	1.41793	1.43557
JAK3	0.118811	0.0550397	-0.192196	0.84781	1.33176	0.750575
JAKMIP2	0.324222	-0.19649	-0.192084	0.975478	1.43264	1.214
JAM2	0.312411	-1.16852	0.393241	1.69166	1.32482	0.986775
JUP	0.0487926	0.0547086	-0.109434	1.08985	1.32464	0.987521
KANK2	-0.0788769	-0.0384345	0.110356	1.81493	1.79395	1.7317
KBTBD13	0	0	0	1.57394	0	1.1739
KCNH1	0.288657	-0.386792	0.0195872	0.826159	1.40804	1.42568
KCNH7	0	0	0	0.991742	0.693709	0.703195
KCNK10	0.542472	-0.591214	-0.184835	0.621737	1.43989	1.66236
KCNMB1	0.33469	0.147493	-0.663716	1.62238	1.89518	1.75598
KCNMB4	-0.506094	0.471991	-0.137885	1.11381	1.03099	0.996506
KCP	0.259922	-0.157647	-0.142259	1.66927	1.78107	0.907117
KDELR3	-0.0580675	-0.240399	0.25452	1.6293	1.62086	2.1484
KIAA0226L	-0.298035	0.221072	0.0300408	2.09566	1.50271	1.48707
KIAA0513	-0.0580052	0.0792948	-0.0248731	1.35408	1.48205	1.33913
KIAA0664L3	0.15769	-0.0732287	-0.0985174	1.38441	1.30866	1.17241
KIAA0748	0.0581668	-0.0906077	0.0281886	1.5431	1.60241	1.36696
KIAA1107	0.258969	-0.188258	-0.111365	1.38288	1.35182	1.04615
KIAA1161	0.00839453	-0.275284	0.223888	1.40921	1.40825	1.0109
KIAA1217	0.0977054	0.00954489	-0.115141	1.12062	1.73879	1.36794
KIAA1239	0.175067	-0.098408	-0.0940023	2.22252	2.67381	2.09054
KIAA1257	-0.0488229	-0.206677	0.222489	1.10314	1.27201	1.17243
KIAA1324L	0.137745	-0.383907	0.180729	1.25951	1.10801	0.760731
KIAA1370	0.151257	-0.20674	0.0327642	1.04267	1.11656	1.13749
KIAA1462	-0.401974	0.571779	-0.401974	1.00273	1.11016	1.12626
KIAA1522	-0.0504395	0.0791346	-0.0321325	1.63471	2.16551	1.71872
KIAA1539	0.0528316	-0.0886888	0.0318527	0.933043	1.29808	1.10028
KIAA1614	-0.144645	0.0585641	0.0758327	1.77352	1.92382	1.66127
KIAA1671	0.131351	-0.65549	0.344626	0.94193	1.7727	1.61556
KIAA1683	0.184139	-0.194301	-0.0146965	0.63294	1.06699	0.937239
KIF17	-0.440261	0.43415	-0.133078	2.0395	1.37762	1.54852
KIF5C	-0.15846	0.361514	-0.287633	1.13002	0.908893	1.06541
KIFC3	-0.0398874	0.00735545	0.0316178	1.8634	2.08117	1.75323
KIR2DL4	0.184062	-0.618331	0.277982	1.17483	1.26129	0.989853
KIR3DX1	0.0774154	-0.524307	0.321444	1.61986	1.53908	1.19178
KL	0.0614548	-0.0373188	-0.0261783	0.789922	0.716686	1.87235
KLF2	0.043928	0.00463927	-0.0501107	1.13401	1.10885	0.748944
KLHDC7B	0.5696	-0.483495	-0.320764	1.22482	2.10994	1.30401
KLHDC8B	0.0832897	0.244586	-0.403893	1.64695	1.59257	1.55587
KLHL24	0.105307	-0.226246	0.0968285	1.01559	1.13936	1.11744
KLHL3	0.486734	-0.330566	-0.315617	1.08261	1.27178	1.26966
KLHL30	0.0703062	-0.0701358	-0.00359367	1.82607	2.15959	1.9564
KLHL33	-0.0197211	-0.396619	0.326469	0.816332	1.26377	1.28072
KLRB1	0.545787	-0.376898	-0.376898	1.93179	0.969969	1.55912
KLRC3	-0.146792	0.255182	-0.146792	1.06616	0.798932	1.02711
KLRC4	0	0	0	1.57394	0	0.957662
KRT23	0.0501237	-0.159065	0.096317	1.63995	1.47813	1.37212
KRT7	0.24003	-0.136868	-0.136868	1.07608	1.02332	0.820794
KRT79	-0.0167655	0.322343	-0.393664	1.01104	1.11847	1.28368
KRT8	0.0850644	-0.46404	0.280138	1.90922	2.46517	2.65831
KRT80	-0.0326621	-0.359422	0.31372	1.12451	1.08207	0.826024
LAMA2	-0.173581	0.124932	0.0326714	1.20218	1.30318	1.77083
LAMA3	0.281088	-0.383159	0.025925	1.12674	1.37193	1.24086
LAMB3	-0.0754565	-0.000102744	0.0718031	1.49436	1.52209	1.37441
LAMC2	0.198682	-0.244192	0.0115839	1.73543	1.5931	2.00001
LAMP3	0.105926	0.131002	-0.270972	0.459391	1.38942	1.09095
LARP6	-0.25463	0.291775	-0.0928753	1.02209	1.23437	0.694138
LAX1	0.241782	-0.345342	0.0432421	0.814748	1.12877	1.2464
LBH	0.0417846	0.281968	-0.405907	3.64915	3.66676	3.62132
LCAT	0.152919	0.0900256	-0.279644	1.05736	0.804033	0.991283
LDHD	0.308477	0.0727713	-0.494383	1.26753	1.28652	1.35712
LGALS3	-0.13142	0.199167	-0.0907528	1.03737	0.962667	1.0955
LGALS3BP	0.0173245	0.109222	-0.137215	2.76374	2.82825	2.71514
LIF	0.41358	-0.261869	-0.261869	1.46352	2.38157	1.5506
LILRA4	0.0444607	-0.162218	0.104407	1.10937	1.15288	1.37535
LILRA6	0.185725	-0.10894	-0.0964335	0.499668	1.09461	1.33687
LILRB1	0.187309	0.109038	-0.353185	0.890777	1.31177	1.15482
LINC00086	0.24003	-0.136868	-0.136868	1.43707	1.78093	1.79915
LINC00184	0.23051	-0.214379	-0.0516482	1.3366	1.40996	0.969758
LINC00256A	0.206204	0.0999252	-0.368414	1.36338	1.2341	1.46469
LINC00263	0.0307739	0.0810323	-0.119251	1.05227	1.11645	0.98327
LINC00282	-0.570804	0.264916	0.170171	1.18532	1.25985	1.42954
LINC00482	0.118709	0.00129361	-0.130776	0.962733	1.12123	1.103
LIPG	-0.0346119	0.0597024	-0.0270061	1.2557	1.29305	0.812334
LIPN	0.416751	-1.06369	0.246926	1.74195	2.36974	2.00027
LMO7	0.251246	-0.236642	-0.0573213	1.048	0.878347	1.1408
LMTK3	-0.108003	-0.451979	0.423405	1.29717	1.14461	0.624085
LOC100129269	0.0697719	0.11033	-0.199298	0.968264	1.42543	1.07166
LOC100129726	0.219704	-0.164084	-0.0846539	1.65333	1.97095	1.65785
LOC100131289	-0.103586	-0.00968618	0.105644	1.28044	1.78112	1.62293
LOC100131347	0.293076	-0.0853638	-0.264992	1.93252	1.84759	1.45756
LOC100132735	0.226815	0.277883	-0.69587	1.51352	1.6299	1.1166
LOC100132987	0.443387	-0.288326	-0.283921	1.41245	1.72168	1.82339
LOC100268168	-0.367133	0.339572	-0.0599502	0.945013	1.28319	0.893436
LOC100271722	0.420979	0.238648	-1.05506	1.10974	1.0319	0.970653
LOC100287616	-0.0992864	0.24325	-0.17976	1.13673	1.16679	0.893179
LOC100302650	-0.484852	0.351998	0.0130738	0.939016	0.788754	0.991597
LOC100329135	0.305503	-0.187752	-0.174332	0.574699	1.29527	1.5449
LOC100505687	-0.121316	0.179221	-0.0764649	1.23779	1.1051	1.00144
LOC100505702	-0.187963	0.271506	-0.128017	1.61225	1.53279	1.92906
LOC100506071	0.10103	0.35477	-0.624421	0.60699	1.12893	1.15118
LOC100506368	0	0	0	1.21295	0.388155	1.36192
LOC100506433	-0.442949	-0.144644	0.443361	2.03681	2.24078	2.0778
LOC100506451	0.224418	-0.296294	0.02482	1.28933	1.21953	1.45702
LOC100506795	0.384277	-0.52233	-0.00209591	2.14435	1.92021	2.14372
LOC100506810	0.221751	-0.190657	-0.0624362	1.83337	1.71517	2.11306
LOC100506895	-0.365601	-0.280669	0.486092	0.747225	1.11881	1.00483
LOC100507299	-0.297557	-0.715237	0.657426	0.778151	1.28178	1.3693
LOC100507632	0.366047	-0.125186	-0.332248	1.55292	1.958	1.83506
LOC100653515	0.364574	0.0320171	-0.535211	1.52649	1.32501	0.294626
LOC149086	-0.406526	0.112582	0.219588	2.31955	2.29184	2.14345
LOC149837	-0.0717422	-0.0895743	0.148884	1.03986	1.31115	1.33507
LOC151475	0	0	0	1.86244	1.34687	1.67734
LOC200261	0.308477	0.0727713	-0.494383	1.4666	1.88394	1.80542
LOC201477	-0.154126	0.0650316	0.0775376	0.574341	1.07797	1.16549
LOC253573	0	0	0	0.991742	0.945724	0.394024
LOC257358	-0.0400845	0.462935	-0.623579	1.70936	1.40562	1.92397
LOC282997	-0.277038	0.185575	0.0530368	0.989031	1.08285	1.0317
LOC283335	0.0702709	0.0239866	-0.0995548	0.676728	1.09149	1.43266
LOC284551	-0.173687	0.0224481	0.134543	2.05372	1.98677	2.27754
LOC284648	0.196946	-0.255596	0.0230281	0.977792	1.40727	1.17739
LOC285547	-0.207667	0.309241	-0.160028	0.979326	1.61022	1.54897
LOC285758	0.398168	-0.513352	-0.0268323	1.34181	1.78866	1.81035
LOC285954	-0.0468473	-0.0160588	0.0607667	1.89975	1.42333	1.8329
LOC285972	0.0274187	0.0691772	-0.102071	1.41873	1.16482	1.0647
LOC286367	0.20973	-0.11605	-0.119013	1.07903	1.23337	1.31087
LOC286442	-0.291095	0.00720976	0.235982	2.95658	3.45134	3.24968
LOC338739	-0.148529	-0.12485	0.23968	1.12766	1.06921	0.774648
LOC338758	-0.018144	-0.135559	0.140361	1.04465	1.18841	0.987491
LOC339524	-0.0821456	0.129889	-0.0571837	1.16373	0.929775	1.17567
LOC348840	0.0770023	-0.145571	0.0581839	1.0569	1.05259	1.04252
LOC389634	-0.292089	-0.251531	0.425757	1.24186	1.06357	0.844931
LOC400958	0.105926	0.131002	-0.270972	0.72077	1.52386	0.902932
LOC401242	-0.726627	-0.456955	0.737395	1.2749	1.06371	0.696282
LOC440356	0.387391	0.0988205	-0.687157	1.00922	0.93757	1.42016
LOC441869	0	0	0	0.991742	1.9178	1.36192
LOC541471	-0.351752	0.340332	-0.0735144	1.1026	1.11144	1.1497
LOC643723	-0.0496861	0.169472	-0.137319	1.04056	0.605545	0.98308
LOC643770	-0.130765	0.246627	-0.151646	1.36189	1.23366	0.675027
LOC643802	0.0282151	-0.129477	0.0923256	1.22342	0.867439	1.06598
LOC645434	0.386481	-0.120694	-0.371359	1.00831	1.31754	1.56979
LOC653712	0.0816215	0.0782973	-0.174586	1.0018	0.686774	1.17863
LOC678655	0.297955	-0.245852	-0.10892	1.17079	1.06709	1.31495
LOC728392	-0.225287	-0.14332	0.309341	0.982779	1.03493	0.920552
LOC730091	0.782821	-0.238175	-1.21193	1.18967	0.924231	1.22016
LOC730102	0.110424	-0.0611909	-0.0559183	0.995586	0.976181	1.07888
LOC730227	-0.423966	0.748995	-0.800864	1.50783	1.43321	1.86337
LOC731424	-0.341561	0.513225	-0.351855	1.4826	1.48557	1.5941
LOC79015	-0.622523	0.0934836	0.360109	1.23992	2.15687	1.42729
LOC90246	-0.0334184	-0.0171217	0.0492061	1.11804	1.03238	1.15306
LOXHD1	0.216164	-0.289936	0.0291645	1.24984	1.17997	1.18497
LOXL4	-0.261226	-0.467905	0.528679	1.53899	1.65894	1.61663
LPAR5	-0.0516218	-0.0345132	0.0824134	2.85932	3.08786	2.7574
LPIN3	0.108638	-0.158117	0.0364633	1.63773	1.69429	1.77768
LPP-AS2	0.134961	0.0857871	-0.250389	1.29605	1.67333	1.42278
LRP1	0.485232	-0.527272	-0.141902	1.38391	2.01151	1.22645
LRP4	0.0492444	-0.29274	0.200287	1.10117	1.29979	1.13139
LRRC16A	0.532114	-0.148809	-0.617148	1.27954	1.70904	1.17663
LRRC29	0.141853	-0.025405	-0.129522	1.26842	1.17921	1.12885
LRRC31	0.105926	0.131002	-0.270972	3.21643	2.69099	1.98261
LRRC36	0	0	0	0.991742	1.34687	0.957662
LRRC6	0.0487129	-0.125289	0.0687915	1.35225	1.66064	1.38955
LRRC8E	0.307952	-0.0520701	-0.326444	0.760827	1.51374	0.975948
LTBP1	-0.0752115	-0.176886	0.221799	1.36754	1.17997	1.47925
LTBP3	0.118992	0.0462047	-0.182001	1.41804	2.14574	1.14125
LTK	0.427885	-0.373697	-0.179617	1.44648	1.46447	1.51323
LY9	-0.101396	0.260296	-0.200672	1.39818	1.17387	1.29479
LY96	-0.505	0.117656	0.275447	1.33567	0.69591	0.870288
LYPD6B	-0.287767	-0.0429069	0.275166	0.914999	1.05835	1.08189
MACC1	0.225616	0.0189371	-0.29069	2.28845	1.43909	1.45822
MAGEF1	-0.068857	0.075186	-0.00997439	1.06155	1.17033	0.921625
MAGI2-AS3	-0.205922	0.0722886	0.11321	1.06991	1.03857	1.14301
MAMDC2	0.175067	-0.098408	-0.0940023	1.70901	0.659811	1.7532
MANSC1	-0.236202	-0.394319	0.475265	1.30542	1.24496	1.86976
MAP2	0.242168	0.0177018	-0.313145	2.74906	2.57515	2.45871
MAP3K8	-0.0491837	-0.0865388	0.126626	1.33096	1.44033	1.31791
MAP4K1	0.0239176	0.062196	-0.0904502	1.35016	1.55811	1.45618
MAP7	-0.298675	-0.16269	0.37144	1.55514	1.57969	1.51157
MAPK11	-0.0941604	0.0634589	0.0260417	1.28191	1.24143	1.16515
MAS1	-0.018244	0.00683172	0.0112374	0.817809	1.39969	2.03695
MATL2963	0.282552	-0.328514	-0.0184412	0.765779	1.05965	1.13021
MATN2	0.0751328	-0.188002	0.095886	2.95748	3.18913	2.95213
MBOAT2	0.110204	-0.162296	0.0384603	1.05134	1.12529	1.17981
MCAM	-0.00604745	0.0700941	-0.0673373	1.66436	1.87009	1.73055
MCC	0.346423	-0.218479	-0.202365	1.5095	1.40314	1.47272
MCOLN3	-0.0474382	0.161223	-0.129556	1.53545	1.55419	1.60663
MCTP2	0.154641	-0.253334	0.0675007	0.922837	1.00907	1.22617
MDFI	0.142288	-0.0163291	-0.13987	1.71733	1.88617	1.87525
MDH1B	-0.0657837	0.149763	-0.0966735	0.843729	0.555189	1.25802
MDK	0.0396912	-0.0815659	0.0385414	1.15057	1.32738	1.13536
MEI1	-0.19744	0.0467258	0.130911	1.09237	1.52677	1.45331
MERTK	0.125971	-0.131498	-0.00596381	1.14877	1.16914	1.16897
METTL7A	-0.175858	0.212754	-0.0651277	1.17892	1.16406	1.18082
MFAP4	-0.0752245	0.0329969	0.0393775	1.14608	1.33013	1.0918
MFGE8	-0.0251846	-0.0903788	0.108396	1.57344	1.90226	1.70629
MFI2	0.140163	-0.0146683	-0.139099	1.28638	1.44776	1.05352
MFSD7	-0.0334663	0.134626	-0.112285	1.20296	0.816388	0.931039
MGAT3	-0.334803	0.262052	0.0113869	0.862241	1.2061	1.22432
MGP	0.24003	-0.136868	-0.136868	1.58852	0.556841	1.22505
MICALL2	0.155824	-0.16344	-0.0100638	1.21537	1.46523	1.06341
MIR143HG	-0.176588	-0.594268	0.538862	1.41262	1.53258	1.35396
MIR181A2HG	0.309002	0.187745	-0.684626	0.835747	1.33556	1.57878
MIR21	0.24003	-0.136868	-0.136868	1.07608	1.02332	0.820794
MIR4420	-0.131203	0.207905	-0.101722	1.21729	1.15229	1.16924
MIR4750	0	0	0	0.991742	0.945724	0.394024
MLLT11	0.0560628	-0.134342	0.0694131	1.31314	0.995303	0.728317
MLPH	0	0	0	0.991742	1.16019	1.36192
MLXIPL	-0.197773	0.293658	-0.148224	1.93949	2.58104	2.07166
MMP1	-0.401974	0.571779	-0.401974	1.32342	0.944893	0.77193
MMP11	-0.578702	0.128003	0.307608	1.23472	1.92004	0.901142
MMP19	0.469823	0.0406115	-0.769771	1.52751	2.0005	1.80964
MMP2	0.280131	-1.27637	0.457187	1.19426	1.64637	1.51139
MOV10L1	-0.209773	-0.169215	0.317304	1.68595	1.60811	1.1646
MOXD1	0	0	0	1.21295	0.693709	0.703195
MPP2	0.0290623	0.0769945	-0.112735	1.59405	1.96798	1.68915
MPZL2	-0.114571	0.1551	-0.0546252	0.950339	1.67576	1.55367
MR1	0.0647244	-0.0784661	0.0101365	1.14998	1.19112	1.20804
MRC2	0.0738528	-0.0582321	-0.0188256	1.20403	1.3429	1.11893
MRO	0.542472	-0.591214	-0.184835	1.27123	1.20362	1.22125
MSR1	-0.505332	0.374315	-0.00104204	1.3339	1.01419	0.904075
MTTP	-0.27099	-0.0388595	0.260417	1.13418	0.823265	0.664859
MUC1	0.287038	-0.237229	-0.102381	0.894771	1.92202	1.2424
MX1	-0.10275	0.363734	-0.354774	1.22125	1.22175	1.084
MX2	-0.214729	-0.0103775	0.195926	1.02364	1.30798	1.1782
MXRA7	-0.0414838	0.0915247	-0.0546182	1.00063	1.02419	1.03396
MYBPHL	-0.604935	0.12493	0.324285	1.47684	1.25121	1.58366
MYH10	0.0816139	-0.140976	0.049482	1.1936	0.96634	1.0102
MYL2	0.0710496	0.369354	-0.604399	1.70429	1.19043	1.07294
MYL9	0.385571	-0.37935	-0.112725	0.892239	1.23041	2.05054
MYLK3	0.0728689	-0.293194	0.179002	1.82134	1.47796	1.91517
MYO15B	0.198379	-0.061279	-0.161367	1.52532	1.68822	1.314
MYO16	0	0	0	1.21295	1.16019	0.394024
MYO5C	-0.055219	0.0203199	0.033324	1.90584	2.08068	2.29945
MYO7B	0.0276906	0.178156	-0.235851	3.37904	3.55486	3.37501
MYOZ1	-0.121356	0.176948	-0.0737172	2.64758	2.32719	2.5847
MZB1	0.203947	0.141941	-0.42514	1.70087	1.8881	1.88855
N4BP2L1	-0.127076	0.125847	-0.00989238	1.5859	1.70541	1.68244
NAV1	0.314486	-0.174178	-0.20065	0.923375	1.17729	1.04793
NBEA	0.0223877	0.289746	-0.392258	0.479213	1.20457	1.04786
NCF1	-0.0294349	0.227101	-0.234948	1.20717	1.27858	1.16185
NCF1C	-0.137274	0.317099	-0.243076	1.10008	1.25269	1.15596
NCR3	-0.17345	0.242723	-0.104611	0.680459	0.72397	1.3571
NDRG1	-0.059953	0.0524827	0.00526583	1.09863	1.10642	1.05723
NECAB2	-0.27099	-0.0388595	0.260417	1.27146	1.63399	1.21182
NEDD9	0.0701702	-0.160136	0.0775421	1.28022	1.18054	1.20509
NEU4	-0.237227	0.101882	0.108963	2.24605	2.16527	1.73147
NGEF	-0.114571	0.1551	-0.0546252	1.88695	1.74214	1.55367
NHLRC4	-0.35123	0.412923	-0.176733	1.95263	1.90843	1.77037
NLRC3	0.13354	-0.126124	-0.0192756	1.41236	1.56082	1.37975
NLRP1	0.119668	-0.116056	-0.0133225	1.39123	1.45836	1.46027
NMNAT2	-0.107562	0.0535605	0.0482662	1.23975	1.31533	1.40647
NMUR1	-0.0515593	0.0469916	0.00288075	1.46412	1.73809	1.53465
NOD2	0.135073	0.171712	-0.366882	0.951318	0.994745	1.19396
NOG	-0.141993	0.213691	-0.0983786	1.83095	1.76383	1.39217
NOTCH3	0.542472	-0.591214	-0.184835	1.39638	1.43989	0.937017
NOX5	0.173694	-0.501755	0.221333	1.89984	0.191954	1.93034
NPM2	0.288657	-0.386792	0.0195872	1.47565	1.84729	1.7685
NR1I2	-0.0455358	0.33682	-0.380633	1.68106	1.34976	1.56181
NR2F2	-0.426196	0.389263	-0.0800059	1.1845	1.11471	1.5425
NR5A1	0.246907	-0.260267	-0.0314945	1.41501	1.33632	0.815797
NRCAM	-0.0382443	-0.244923	0.241596	1.34776	1.5324	1.83961
NRG2	-0.511175	-0.0517061	0.415277	1.72135	1.96808	1.54967
NRP2	0.11388	-0.175658	0.0461442	1.81281	1.84449	2.10912
NRXN2	0.0993226	-0.006956	-0.0992169	0.856442	1.21405	1.14948
NT5E	-0.0337455	0.246308	-0.256784	1.44356	1.27353	1.3964
NTN1	0.036179	0.105202	-0.153671	1.3932	1.54559	0.931185
NTNG2	-0.434069	0.168102	0.18428	1.07451	1.20351	0.928389
NTRK1	-0.146792	0.255182	-0.146792	1.8408	1.77101	1.38144
NTRK2	-0.121356	0.176948	-0.0737172	2.24752	2.10683	2.12827
NUAK2	0	0	0	1.40471	0.693709	1.1739
NUDT14	-0.475243	0.168237	0.210351	1.40273	1.41681	1.17217
NUP62CL	-0.0275811	-0.171529	0.177643	1.11862	1.28192	1.21935
NUPR1	-0.41194	0.598285	-0.44522	0.963821	1.10758	0.851539
NYNRIN	0.104316	-0.272582	0.133798	1.71501	2.1394	1.77724
OAS1	-0.161323	-0.305265	0.374624	1.24993	1.21926	1.35099
OASL	0.0541029	-0.0359116	-0.019797	1.66106	2.02286	1.6996
OBSCN	0.116115	-0.0882562	-0.0357434	1.22799	1.15174	0.828526
ODF3L1	-0.0490133	0.306192	-0.327415	1.51439	1.99317	1.61595
ODZ1	0	0	0	1.40471	1.16019	1.36192
ODZ3	-0.0982654	-0.280597	0.313355	1.74097	2.08494	1.67696
OLAH	0	0	0	1.40471	1.9178	1.36192
OLFML2A	0.230579	-0.277401	0.00233194	1.78872	2.18548	1.81931
OLFML2B	0.414145	-0.532557	-0.0348062	1.25962	1.19917	0.915454
OLR1	-0.00537198	-0.0492149	0.05277	2.09028	2.10004	2.22933
OPHN1	-0.0346497	-0.129201	0.149771	0.840149	0.912615	1.19872
OPTN	0.176442	0.216999	-0.499007	2.22389	2.34384	1.93308
ORAI3	-0.0877748	0.0970639	-0.0153267	1.0979	1.15635	0.942863
OSCAR	-0.0309851	0.0937103	-0.0677314	1.19599	1.23252	0.851385
OSCP1	0.301388	-0.448386	0.0493642	0.479526	1.04353	1.16123
OSM	0.216003	-0.00390964	-0.249487	1.93692	2.11754	1.60953
OSTalpha	0.0990469	0.109279	-0.234049	1.27432	1.32814	1.25771
OVOL1	-0.0167655	0.322343	-0.393664	3.76062	3.67196	3.33405
OXER1	-0.103415	0.234218	-0.163423	1.60605	1.47962	1.08333
P2RY13	0.0684953	-0.20498	0.116134	1.88192	1.42415	2.12704
P4HA2	-0.234918	0.137579	0.0706764	1.16111	1.19804	1.2007
PADI2	0.17857	-0.0715861	-0.125561	1.38228	1.52922	1.41134
PAOX	0.0666359	0.238439	-0.371437	1.30861	1.67592	1.16093
PAPSS2	0.0166007	0.398957	-0.578041	0.908266	1.26921	1.13096
PARP10	-0.00872734	-0.0638723	0.0694798	1.49575	1.62055	1.28586
PARP14	0.126108	-0.22827	0.0772381	1.13911	1.10888	1.2865
PARP9	0.0333302	-0.149738	0.104624	1.19822	1.15529	1.31226
PBX4	-0.19952	0.189688	-0.0164782	0.635237	1.23149	1.0489
PCDH12	0.40296	-0.260347	-0.246575	1.64923	2.24038	1.67146
PCDHGB5	0.132608	-0.245832	0.0846051	0.943187	0.606092	1.17255
PCDHGC5	-0.89494	0.65492	-0.171852	1.20781	0.765454	1.35864
PCGF2	0.363218	-0.326842	-0.125905	0.882395	0.714879	1.34495
PCOLCE2	-0.132345	0.104755	0.0176958	1.19409	1.17742	1.14162
PCSK4	0.37388	-0.309936	-0.156033	1.15586	1.49859	1.00615
PCYT1B	0	0	0	0.410914	1.51213	0.703195
PDCD1	0.0444607	-0.162218	0.104407	2.69156	2.72036	2.21555
PDCD1LG2	-0.401974	0.571779	-0.401974	2.1692	1.9238	1.8516
PDE1B	0.0484867	0.0296865	-0.0815678	1.46506	1.42771	1.53191
PDE7B	0.107127	-0.0651629	-0.0482909	1.16474	1.26883	1.13606
PDGFRB	-0.315001	0.0450477	0.219627	2.58494	2.5662	2.53254
PDGFRL	-0.0701869	0.106044	-0.0421407	1.88324	1.73224	2.19181
PDK4	0.107169	-0.105982	-0.00909616	1.19225	1.62785	1.44171
PDLIM2	-0.449934	0.173797	0.188908	0.762929	0.517273	1.28303
PDZD2	0.236118	-0.273521	-0.00740107	1.22173	1.57692	1.42657
PECR	-0.0348927	-0.0536424	0.0846017	1.05144	1.06646	1.14543
PEX11G	0.0359528	-0.0829681	0.0435587	1.47375	1.60544	1.16883
PGAM2	0.0367178	-0.340041	0.243918	1.34341	1.27856	0.9012
PGF	0.231082	-0.063582	-0.201909	1.16054	1.30831	1.03687
PHC1	0.344392	-0.274738	-0.14595	1.07196	1.0423	1.06619
PHKA1	0.435484	0.0694209	-0.740962	1.18469	1.14075	0.680808
PHLDB2	0.410153	-0.158084	-0.367809	2.29728	2.28445	2.15593
PI15	0	0	0	0.730363	1.34687	1.67734
PIEZO2	0.146937	0.0215647	-0.188161	0.69165	1.39955	1.1748
PIGR	-0.029551	0.0110066	0.0180878	1.94403	2.61011	2.09554
PIK3IP1	0.0882904	0.0503876	-0.149845	1.11884	0.866183	1.10849
PIK3R6	-0.0266876	0.0513299	-0.0260453	2.10245	2.21463	2.07294
PIPOX	0.107801	-0.0715182	-0.0427844	1.66334	1.62397	1.4799
PKDREJ	0.0744015	0.0982617	-0.190021	0.78058	1.07483	1.06391
PKP3	0.536586	-0.0760098	-0.735076	0.850529	1.11218	1.27583
PLA2G15	0.016043	0.0610973	-0.0807609	1.00769	1.18725	1.01682
PLA2G16	0	0	0	0.991742	1.16019	0.394024
PLA2G2F	0.210541	0.164256	-0.46935	0.899297	0.740108	1.2532
PLA2G4E	0	0	0	0.991742	0.693709	0.703195
PLAT	0.360734	-0.0903426	-0.364717	0.644698	1.03548	0.998598
PLB1	-0.268842	0.0755172	0.158694	2.18641	2.2832	2.317
PLCB2	0.136524	-0.060866	-0.0861117	1.19732	1.30481	1.16886
PLCD1	-0.0507988	0.244099	-0.234049	1.30402	1.31187	1.28709
PLCL1	0.100007	-0.274179	0.139208	1.33189	1.10415	1.52299
PLD5	-0.046291	0.18584	-0.161494	0.498422	1.20632	0.981573
PLEKHA4	0.131003	-0.148968	0.00439347	1.24261	0.817444	0.717872
PLEKHA6	-0.0372456	0.0138223	0.0227007	1.14282	1.5334	1.19536
PLEKHA7	0.200958	-0.0195693	-0.210878	1.1211	1.23309	1.0917
PLEKHB1	0.324222	-0.19649	-0.192084	1.71023	0.913667	1.45135
PLEKHG4B	0.399827	-0.0353425	-0.504612	1.1739	1.18428	1.02588
PLEKHH2	0.189015	-0.103791	-0.105582	1.63114	1.83277	1.72266
PLIN2	-0.111185	0.104846	-0.00174214	1.13259	1.07315	1.06988
PLIN4	0.548048	-0.367629	-0.39055	2.64496	2.64273	2.15498
PLIN5	0.225616	0.0189371	-0.29069	1.40568	1.09776	0.980269
PLOD2	-0.119221	-0.0170729	0.125756	1.18768	1.05821	1.12664
PLSCR1	-0.0393855	0.134787	-0.106249	1.03628	1.02241	0.953509
PLSCR4	-0.0636015	0.23497	-0.207153	1.66346	1.78173	1.76167
PLTP	-0.0204982	0.0869182	-0.0709531	1.09097	0.905874	1.03191
PLXNB1	0.0216521	-0.180786	0.140984	1.06073	1.27337	0.817248
PLXNB3	0.0627629	0.000756967	-0.0664106	1.06909	1.62809	0.605703
PLXNC1	0.148183	-0.153913	-0.0101087	1.36282	1.29146	1.31384
PMEL	0.301072	0.0950422	-0.514895	1.93448	2.06655	2.01626
PNCK	0.24003	-0.136868	-0.136868	0.854874	1.21	0.820794
PNMAL2	0.386481	-0.120694	-0.371359	1.21425	1.04171	1.06085
PNPLA7	0.382622	-0.170537	-0.307968	1.2	1.4274	1.10275
POSTN	0	0	0	1.40471	1.34687	0.394024
PPAP2A	-0.139729	0.00412665	0.123594	1.29974	1.31798	1.14043
PPAPDC3	0.125819	-0.012696	-0.124008	1.12769	1.89313	1.71996
PPARGC1A	0.153169	-0.36863	0.155067	1.88041	1.52865	1.58082
PPBP	0	0	0	0.730363	1.66039	0.957662
PPIC	-0.371072	0.146135	0.163745	1.14275	0.88353	1.16127
PPP1R1A	-0.283215	-0.283215	0.439873	1.12149	0.662509	1.24502
PPP1R1C	0	0	0	1.72539	0.693709	1.36192
PRAME	-0.00401986	0.0821363	-0.0828385	1.4151	1.51962	1.71201
PRCD	-0.0283583	0.269946	-0.297428	1.15863	0.808323	1.10866
PRIC285	0.265121	-0.345945	0.0164549	1.52811	1.90094	1.30779
PRICKLE2	-0.189762	-0.138694	0.280847	1.28915	1.66695	1.14113
PRKCH	-0.362927	-0.176746	0.419775	0.996605	1.41394	1.29996
PRL	-0.189762	-0.138694	0.280847	1.09695	1.66695	1.40125
PROC	-0.0905822	0.074196	0.0116132	2.73726	2.62103	2.32681
PROCA1	0.365476	0.174244	-0.77764	1.05265	1.14584	1.04971
PRODH	-0.509644	0.0567539	0.330537	1.401	1.2603	1.3402
PRR15	-0.280018	0.435989	-0.280018	1.70758	2.04575	0.677645
PRR5L	0.118286	0.252008	-0.466552	2.43847	2.4551	2.18938
PRSS36	-0.122992	0.175607	-0.0705436	1.67539	1.63591	1.59114
PRSS8	-0.295393	-0.0469263	0.283511	2.05833	1.69491	1.61063
PRTFDC1	0.0995981	-0.0590188	-0.0460147	1.02906	1.22884	1.44221
PRUNE2	0.116743	-0.0123753	-0.113635	1.07622	1.15018	1.16846
PTGIR	-0.186215	0.406456	-0.329766	1.29773	1.59327	1.17284
PTGR1	-0.0976133	0.252634	-0.194226	1.22295	1.16344	1.17686
PTGS1	0.232043	-0.156291	-0.107532	1.54565	1.55368	1.22112
PTK7	0.0971273	-0.168048	0.0570167	0.988142	1.35818	1.23644
PTP4A3	0.00544137	-0.00978273	0.00429161	0.853615	1.37063	1.46692
PTPRC	0.062437	-0.14388	0.0713369	0.993429	0.996879	1.02494
PTPRH	-0.00376276	0.203095	-0.232024	1.26172	1.53128	1.27556
PTPRN2	-0.130027	0.0479547	0.0736661	1.07557	1.05301	0.949264
PTPRO	0.0474791	0.106494	-0.16823	1.19581	1.14162	1.15321
PTPRR	-0.0283583	0.269946	-0.297428	2.01909	1.70818	2.16034
PTPRZ1	0.148077	-0.211945	0.0405921	1.77782	2.09522	2.16814
PVRL4	0.371609	-0.162735	-0.298895	0.499489	1.43232	1.20721
PXT1	-0.403444	0.312563	0.00293561	1.80595	1.10869	1.85013
PYHIN1	-0.118467	-0.292468	0.336089	1.82709	1.98465	1.61947
QPCT	-0.673938	0.103461	0.377245	1.61099	1.42139	1.82771
QPRT	-0.144814	0.177478	-0.0519986	1.60123	1.51649	1.34753
RAB17	0.661508	-0.599837	-0.3989	0.930705	1.11144	0.941802
RAB26	0.217763	-0.476363	0.161286	0.945682	0.8617	0.932307
RAB27B	-0.235956	0.360899	-0.206475	2.37266	2.03059	2.05138
RAB34	-0.41471	0.0750136	0.258771	0.910486	1.06205	1.28686
RAB37	-0.154233	0.135993	0.00366145	1.73651	1.73597	1.71542
RAB3B	-0.115518	-0.0644502	0.164322	2.06263	1.97981	1.94532
RAB42	-0.213906	0.170819	0.0173568	1.22863	1.26488	1.1099
RAD9B	0.137954	-0.259934	0.0902169	0.942512	0.899226	1.09058
RAP1GAP	0.0159657	0.073979	-0.0950248	1.49847	1.70577	1.25328
RARG	0.141351	0.228597	-0.463215	1.47963	1.28623	0.671175
RARRES3	-0.120237	0.396671	-0.389306	2.46249	2.27629	1.6364
RASA4	0.320149	-0.130927	-0.254469	0.755839	1.20714	0.833481
RASD1	0.25876	0.165605	-0.552338	1.09352	1.00989	0.750054
RASGEF1B	-0.654146	0.62699	-0.285937	1.17196	1.7312	1.20229
RASGRF1	0.16417	-0.0639729	-0.115828	1.2294	1.43971	1.4177
RASGRP3	0.0672788	0.0516021	-0.126823	2.28187	2.24701	2.31978
RASGRP4	-0.106059	-0.0418276	0.136787	1.47948	1.8115	1.63041
RASIP1	-0.0576766	0.227275	-0.203289	1.70482	1.61788	1.60521
RASL10B	0	0	0	0.410914	0.945724	0.957662
RASL12	-0.146792	0.255182	-0.146792	0.84495	1.5136	0.556404
RBKS	-0.149259	0.238311	-0.122373	1.06144	0.990031	1.0491
RBM11	-0.510455	0.116719	0.279451	0.875552	1.34626	1.30086
RBP5	0.175067	-0.098408	-0.0940023	1.60237	1.29445	1.17696
RDM1	-0.0626354	0.419482	-0.504224	0.936291	1.67122	1.32668
RENBP	-0.045916	0.578972	-0.895554	2.21344	1.85208	1.93068
REPS2	0.121725	-0.132316	-0.000578194	1.67261	1.4588	1.47002
RGAG4	0.1212	0.0939236	-0.24282	1.30116	1.24006	1.72382
RGMA	-0.596228	0.000627422	0.420168	2.0712	2.24959	1.82741
RGNEF	-0.0376426	-0.220911	0.223708	2.28404	2.18616	2.27099
RGS1	-0.0492618	0.0534408	-0.00602525	1.33412	1.33581	1.27508
RGS13	0.132197	-0.0744821	-0.0674009	0.783453	1.34567	1.3648
RGS2	-0.106453	0.105685	-0.00704937	1.55779	1.49749	1.66175
RGS3	0.0917106	-0.0858355	-0.0114013	1.21773	0.856911	1.33791
RGS9	-0.207667	0.309241	-0.160028	0.521592	1.35096	1.37046
RGS9BP	-0.0854671	0.252166	-0.206684	0.984933	1.14917	0.804627
RHBDF1	0.153733	0.12071	-0.321413	1.95779	2.07585	1.55605
RHOH	-0.0872135	0.051246	0.0321029	1.21681	1.27793	1.29339
RIMS2	-0.131655	0.0545258	0.0686002	1.6995	1.47218	1.85184
RINL	0.0553015	0.034638	-0.0944581	1.2657	1.36596	1.35088
RIPK3	0.276617	-0.192429	-0.130494	0.792301	1.20391	0.8636
RLTPR	0.142445	-0.236524	0.0668641	0.979772	1.17763	0.806512
RNASE4	-0.195819	-0.0681016	0.230241	1.08758	0.78716	1.0836
RNF213	0.117753	-0.285063	0.129943	1.11192	1.01236	1.15702
RORC	0.24003	-0.136868	-0.136868	1.07608	1.37526	1.03704
ROS1	-0.341641	0.13788	0.1513	2.16191	2.39443	2.4416
RPGRIP1	0.0359337	-0.0245747	-0.0120687	1.37618	0.768674	1.25887
RRAS	-0.158853	0.198521	-0.0637981	0.934413	1.03653	0.996853
RSAD2	-0.810401	-0.00807451	0.521411	0.642643	1.2757	1.21587
RSPH1	0	0	0	0.410914	0.693709	1.1739
RSPO3	0.0903708	-0.092501	-0.00366796	1.97354	2.05673	2.03061
RTKN2	0.0209256	0.0653389	-0.0907122	1.12978	1.26553	1.42618
RTN2	-0.261715	0.219416	0.00236634	1.1016	1.35268	1.50744
RTP4	-0.177793	0.210884	-0.0610775	1.00826	1.1424	1.15547
RYR1	0.324222	-0.19649	-0.192084	1.38913	1.5377	0.929768
S100A1	0.14621	0.00325506	-0.166369	0.849222	1.14873	1.03336
S100A16	-0.0167655	0.322343	-0.393664	2.09521	1.84041	2.12003
S100A2	-0.174049	0.018432	0.138539	1.34357	1.57843	1.4499
S100A3	0.0561849	0.0760792	-0.142197	1.30714	1.12265	0.721383
S100B	-0.0283583	0.269946	-0.297428	1.94522	1.62196	2.44209
S1PR5	-0.395264	0.436221	-0.173654	2.42083	2.14549	1.89678
SAG	-0.102851	0.116307	-0.0220203	1.51706	1.73133	1.61242
SALL2	0.148547	-0.0871587	-0.0737388	1.35243	1.1751	1.04617
SAMD4A	0.078936	-0.00262589	-0.0807291	0.979515	0.98441	1.24651
SAMD9L	0.126806	-0.290482	0.124987	1.72662	1.86649	1.82685
SARDH	-0.40638	-0.40638	0.576252	1.99521	1.51142	1.74891
SAT1	-0.128597	0.109843	0.00887147	1.3684	1.38114	1.35181
SCD5	-0.287836	0.101721	0.14772	1.12056	1.02948	1.19468
SCG3	0.175067	-0.098408	-0.0940023	0.49136	1.82539	1.65491
SCIN	-0.025817	0.0958	-0.0754015	1.80858	1.79739	1.91171
SCNN1D	0.471456	-0.194408	-0.43526	0.985806	1.6615	0.268579
SCRN1	-0.0565225	-0.0328436	0.0853283	1.12658	1.0937	1.29131
SCUBE2	0.383753	-1.09717	0.29612	0.628217	1.74568	1.24842
SDS	0.206759	-0.19212	-0.0430681	1.96684	1.91166	1.53213
SEC16B	-0.0580335	0.0390385	0.0172072	1.14583	1.48724	1.3713
SECTM1	-0.145781	0.301589	-0.21155	1.1509	1.00609	1.21022
SELENBP1	0.156055	0.0783883	-0.268946	1.51405	1.09887	1.67442
SELM	-0.131203	0.207905	-0.101722	2.53623	2.39553	1.64719
SEMA3B	0.0496491	0.230387	-0.336724	1.55996	0.912643	0.990391
SEPP1	-0.27566	0.183954	0.0537162	2.06876	1.88438	2.24885
SEPT10	-0.104381	0.414022	-0.439479	1.67872	1.22133	1.37843
SERINC2	0.0508303	0.111286	-0.177966	1.05309	1.13075	0.929858
SERPINA1	-0.143336	0.0648513	0.0684639	2.27634	2.18317	2.23279
SERPINB10	-0.0604121	-0.0556068	0.109454	1.46269	1.37948	1.49528
SERPINB13	-0.0283583	0.269946	-0.297428	1.28379	0.808323	0.973531
SERPINB9	-0.0208974	-0.0551981	0.0730227	2.49208	2.52213	2.54579
SERPINE1	0.0575206	0.143677	-0.226666	1.51057	1.94878	1.82584
SERPINE2	-0.0437981	0.120228	-0.0846764	0.739772	1.20929	0.935045
SERPING1	0	0	0	0.991742	0.693709	0.957662
SERPINI1	0.084961	0.00923616	-0.100177	1.60441	1.55439	1.74536
SETBP1	0.208712	-0.291551	0.0388864	1.8137	2.33772	1.5711
SFRP2	0.110731	-0.249291	0.109581	2.52318	2.45235	2.02984
SFRP4	0.545787	-0.376898	-0.376898	1.48554	1.75926	1.67292
SFTPB	0.0059689	-0.0840456	0.0737458	2.44667	2.79068	2.60577
SGSH	0.00556457	-0.0477294	0.0407911	1.85296	2.24424	1.8042
SGSM1	-0.132569	-0.107493	0.213621	1.06447	1.15093	1.303
SH3TC1	-0.0457459	-0.0492007	0.0905006	2.30357	2.2102	1.98348
SH3TC2	0.130901	-0.0521652	-0.0884462	1.12613	1.23161	1.2141
SHOX2	0.0466398	-0.27871	0.192593	1.11621	1.35292	1.06513
SIGLEC10	0.073452	0.105914	-0.198274	0.948353	1.38139	1.08699
SIGLEC11	0.225616	0.0189371	-0.29069	1.8741	1.33404	0.664849
SIGLEC12	0.262493	-0.155187	-0.148106	2.33642	2.35152	2.2747
SIGLEC14	0.151462	0.191915	-0.420769	1.13241	1.43145	1.11262
SIGLEC5	-0.232646	0.330683	-0.165987	1.39218	1.68537	1.36766
SIGLEC6	-0.174235	0.0742323	0.0853728	2.58352	2.80995	2.27606
SIGLEC9	-0.200241	0.151224	0.0272723	0.980632	0.96913	1.13351
SIGLECP3	-0.163011	0.0691199	0.0810182	2.4107	2.66255	2.58127
SIRPG	-0.113005	0.0156031	0.0901294	1.67275	1.51222	1.76707
SIT1	-0.387302	0.650461	-0.5869	0.552455	1.01578	1.49055
SLA2	-0.0424549	-0.0225606	0.062833	1.4921	1.29681	1.37426
SLAMF6	0.622827	-0.456127	-0.451721	1.79093	1.9213	0.503818
SLAMF7	0.0275691	0.346771	-0.496151	1.72659	2.09328	1.76998
SLC13A5	0.104316	-0.272582	0.133798	1.30136	1.52225	1.88271
SLC14A2	0.0198416	-0.322499	0.246673	1.23269	0.853382	0.684426
SLC15A3	-0.0839162	0.109961	-0.0331154	1.03655	1.15035	1.01767
SLC16A14	-0.00884045	-0.0904024	0.093355	0.692668	0.896633	1.19509
SLC17A7	0.12041	-0.16816	0.032777	1.28851	0.965254	1.23041
SLC1A7	-0.148546	-0.148546	0.257833	1.4254	1.64628	1.78747
SLC22A17	0	0	0	1.21295	1.16019	0.957662
SLC22A18	0.0903708	-0.092501	-0.00366796	1.38889	1.381	0.910299
SLC22A20	0.205712	-0.511098	0.195418	1.15108	1.59059	1.20053
SLC23A1	-0.235342	-0.0491605	0.24369	1.52715	1.57377	1.35389
SLC25A18	-0.313542	0.349558	-0.118468	1.34474	1.62627	1.41432
SLC25A35	0.255601	-0.0518733	-0.248992	1.00592	1.31848	0.852169
SLC25A45	-0.163011	0.0691199	0.0810182	1.37944	0.931244	1.38341
SLC26A11	0.0487129	-0.125289	0.0687915	1.08242	1.11812	0.634715
SLC26A9	0.27302	-0.563011	0.156755	0.645185	1.33949	0.465007
SLC2A14	-0.199563	-0.107106	0.263921	0.894722	0.998386	0.858761
SLC2A9	-0.0303987	0.082517	-0.0559113	1.05071	0.993326	0.973428
SLC30A3	-0.0939983	0.370265	-0.376157	0.704422	1.27043	1.15605
SLC41A2	-0.506824	0.23779	0.159687	0.966484	0.98964	0.456576
SLC44A2	-0.113746	0.0870993	0.0194634	2.14106	2.27537	2.13367
SLC4A3	-0.401974	0.571779	-0.401974	1.80742	2.67	2.39857
SLC6A12	0.379458	-0.0497535	-0.448026	2.31705	2.31274	2.56803
SLC6A13	-0.0527508	0.0464609	0.00457374	1.97521	2.02985	2.06116
SLC6A16	0.20833	0.184264	-0.497339	1.03357	1.07132	0.700293
SLC7A10	-0.207667	0.309241	-0.160028	2.1024	2.07884	1.78112
SLC7A7	-0.0148035	0.101188	-0.0930296	0.982571	0.917041	1.15553
SLC9A3R2	-0.0490133	0.306192	-0.327415	1.39427	1.0404	0.90215
SLFN12	0.580399	-0.514453	-0.313515	0.694785	1.41718	0.884117
SLFN5	0.107094	-0.404767	0.223528	2.01545	1.84824	2.01063
SMARCA1	-0.187063	0.440112	-0.38666	3.04454	3.03355	2.80982
SMC1B	0.275602	0.144387	-0.547425	0.95772	1.27375	1.55264
SMPDL3B	0.261431	-0.470282	0.110376	0.990186	1.04554	0.940213
SMTNL2	0	0	0	1.21295	2.13616	1.52823
SMYD1	0	0	0	0.410914	0.945724	1.1739
SOCS1	0.0365219	0.112061	-0.162314	1.76333	1.7194	1.52073
SOCS3	-0.133178	0.191872	-0.0801875	1.3024	1.74425	1.41005
SORBS3	0.21865	0.0649633	-0.339532	1.71962	2.01151	1.4963
SORCS2	0.145211	-0.456511	0.220777	1.31636	1.73112	1.34118
SOX13	0.265898	-0.214439	-0.095829	0.985597	1.28111	0.769685
SP140	-0.509575	-0.127219	0.466733	1.43087	1.57464	1.75668
SPAG4	-0.350508	0.343814	-0.0791962	0.521555	1.20865	1.08511
SPATA12	0.315873	0.0273025	-0.441967	1.14364	1.54797	0.990238
SPATA20	-0.0466806	0.129611	-0.0925862	1.03566	1.02748	0.993938
SPATC1	-0.113624	0.345844	-0.313222	1.53486	1.53403	1.21727
SPINK8	-0.0106471	-0.0711556	0.0778959	0.630354	1.07161	1.26846
SPOCK1	0.277964	-0.471809	0.0928263	1.40278	1.17459	0.869771
SPOCK3	0.175067	-0.098408	-0.0940023	0.904326	1.82539	0.861537
SPON2	0.176036	0.0346747	-0.241443	1.10676	1.11269	0.808922
SPP1	-0.0985926	0.0840442	0.00873234	1.15068	1.00193	0.965238
SPTB	0.154611	-0.197091	0.0208694	1.06535	1.01389	0.922478
SRC	0.0589615	-0.121721	0.0554648	1.25071	1.63073	1.10262
SSC5D	-0.206613	0.500092	-0.475682	1.32733	1.83096	1.46353
ST5	0.188089	-0.0270415	-0.185547	1.17438	1.38479	1.31206
ST6GALNAC2	0.342138	0.0693654	-0.549807	2.12068	1.98042	2.0037
ST7-AS1	-0.427504	0.0520171	0.286573	1.1924	1.16354	0.682495
STAB1	0.332152	-0.3019	-0.10481	1.37898	1.53073	1.10259
STAC3	-0.0607438	0.140752	-0.0911859	1.28718	1.28246	1.23239
STAG3	0.173005	-0.426022	0.174131	1.03219	1.1147	0.879079
STAP1	0.206228	-0.149892	-0.0815915	1.33578	1.32136	1.14763
STAT2	0.0818869	-0.0753704	-0.0108607	1.02324	1.16982	1.06414
STAT4	-0.172179	0.404417	-0.342004	1.29969	1.16812	1.36974
STAT5A	0.0379196	-0.0297957	-0.00895994	1.12272	1.1527	1.15242
STON1	0.0621815	0.131114	-0.21622	1.73647	1.59927	1.62096
STX11	-0.124884	0.0616536	0.055558	1.18235	1.18439	1.06576
STXBP5L	-0.192908	0.0802695	0.0948356	0.86334	0.832119	1.17407
STYK1	0.105926	0.131002	-0.270972	1.93842	0.889221	1.66505
SUCNR1	0.0376498	-0.200772	0.142054	1.83123	1.7603	1.81928
SV2A	-0.238276	0.346488	-0.183146	1.74594	1.94638	2.14011
SV2B	-0.108003	-0.451979	0.423405	1.36744	1.14461	1.61397
SYN1	-0.2901	0.226808	0.017083	1.1372	0.694845	1.28803
SYNE1	0.240584	-0.345052	0.0443932	1.12704	1.09116	1.22126
SYNGR4	0.0281177	0.0867879	-0.122937	1.4656	1.85639	0.830449
SYNPO	0.0634052	-0.364537	0.236772	0.969655	1.32958	0.912675
SYNPO2	0.247049	-0.278122	-0.0166013	0.991266	1.01823	1.22028
SYNPO2L	-0.132569	-0.107493	0.213621	3.13825	3.12543	3.31736
SYTL2	-0.0519497	-0.149705	0.181336	2.11793	1.93286	1.86678
SYTL3	0.149666	0.112285	-0.304455	1.4678	1.46537	1.52163
TARP	-0.103983	0.0371851	0.0613332	1.40179	1.3541	1.43747
TAS1R1	-0.146792	0.255182	-0.146792	0.583571	1.0134	1.53055
TBC1D10C	-0.123156	0.0669467	0.0486906	1.1524	1.1798	1.03682
TBC1D29	-0.029551	0.0110066	0.0180878	1.2826	1.70698	0.823232
TBXA2R	0.066219	0.151151	-0.247121	1.53625	1.55063	0.579551
TCAM1P	0	0	0	1.40471	0.388155	0.703195
TCEA3	0.114619	0.0603886	-0.193364	1.38336	1.30772	1.31522
TCF7	0.02478	-0.475483	0.337368	0.935533	0.855384	1.06744
TCHH	0.411633	-0.614087	0.0235618	1.1975	0.993253	0.841605
TCN1	-0.172505	0.253629	-0.119515	2.07024	2.27771	2.30212
TCN2	0.133321	0.184389	-0.382985	1.07308	1.34679	1.36593
TCTEX1D1	-0.0619307	-0.183188	0.215696	1.3117	1.60819	1.63123
TDRD5	0.0212414	-0.225673	0.176286	0.832954	0.689155	1.37783
TDRD9	-0.108907	-0.324254	0.349364	2.18667	2.19896	2.20355
TEAD2	0.059151	0.139299	-0.223007	1.32258	1.08242	0.798399
TENC1	0.147138	-0.499157	0.245021	1.20916	1.96241	1.04476
TEX19	-0.322778	0.181032	0.0932579	1.04043	0.920448	1.06967
TFPI	-0.337859	-0.093355	0.346469	1.00841	1.20498	1.11482
TGFB1I1	0.261431	-0.470282	0.110376	1.2305	1.84076	1.17756
TGFBI	-0.298305	0.120333	0.137251	1.4049	2.11765	1.49755
TGM3	0.0263126	-0.391368	0.28592	1.87814	1.67202	1.93233
THBS1	0.262632	-0.146779	-0.156708	2.12064	3.07447	2.14016
THBS4	0.0880926	0.036811	-0.134172	0.994492	1.22973	1.12125
THNSL2	-0.0932672	-0.199546	0.253115	0.877701	0.842235	0.956885
THSD7A	0.150632	-0.254825	0.0729368	1.32244	1.27974	1.33077
TIE1	0.105926	0.131002	-0.270972	2.3002	2.0548	1.5415
TINAGL1	0.288657	-0.386792	0.0195872	1.3386	1.93898	2.59674
TIRAP	0.180665	-0.137289	-0.0628546	1.11568	1.42743	0.915669
TLR1	-0.00910783	0.0262288	-0.0174952	1.50275	1.5194	1.591
TLR7	0.0728918	-0.306272	0.188335	2.099	2.04813	2.12071
TLR8	0.0521278	-0.178664	0.110612	1.21463	1.15363	1.39395
TLR8-AS1	0.350062	-0.218175	-0.208006	1.74468	1.99141	0.935062
TM4SF1	0.139396	-0.23941	0.0724	0.545869	1.0008	1.0672
TM6SF1	0.410153	-0.158084	-0.367809	2.8303	2.79285	2.93712
TMC7	-0.406526	0.112582	0.219588	0.933716	1.31672	0.926658
TMEM105	-0.150355	0.0247258	0.11328	1.24222	1.40573	1.26809
TMEM132A	0.175067	-0.098408	-0.0940023	0.904326	1.63578	1.31209
TMEM198	0.395278	-0.121446	-0.385454	1.21152	1.34564	0.801047
TMEM2	0.167704	-0.174726	-0.0133421	1.13941	1.13496	1.19869
TMEM200A	-0.238496	-0.21342	0.367238	1.3722	1.61868	2.1186
TMEM22	0.187381	0.0661241	-0.296182	1.03555	0.704247	0.855377
TMEM221	0.224739	0.000272107	-0.266653	1.33281	1.5928	1.4244
TMEM30B	0	0	0	1.21295	0.388155	0.703195
TMEM56	-0.108038	-0.0772493	0.169011	1.8721	1.9527	1.96184
TMEM86A	0.207806	0.0692915	-0.329399	2.55247	2.50573	2.52929
TMEM92	0.218164	0.0927916	-0.376478	1.47161	1.97241	1.24603
TMPRSS13	-0.0381044	0.123695	-0.0945811	1.07935	0.954751	0.723462
TMPRSS4	0	0	0	0.991742	1.66039	1.1739
TNFAIP6	-0.0490936	0.0225623	0.0253047	2.24143	2.17134	2.24179
TNFAIP8L3	0.120642	-0.0372125	-0.0919624	2.7493	2.82014	2.96597
TNFRSF10C	0.0995981	-0.0590188	-0.0460147	1.36303	1.27904	0.90539
TNFRSF11A	0.0536976	-0.138999	0.0757776	1.11462	1.13496	1.24077
TNFRSF14	-0.105661	0.200031	-0.117321	1.46109	1.43338	0.923625
TNFRSF8	0.158939	0.0314051	-0.215031	1.06213	1.29465	1.08436
TNFSF10	-0.0287827	0.10137	-0.0786232	1.03697	0.928252	1.05128
TNFSF15	0.24003	-0.136868	-0.136868	0.593495	1.37526	1.39136
TNNC1	-0.0100777	0.0654612	-0.0580801	1.62936	1.6728	1.26903
TNNT1	0.11759	0.0555839	-0.191327	2.97957	2.2659	2.37016
TP53INP1	0.139727	-0.0522682	-0.0986844	1.68691	1.73982	1.65464
TP53INP2	0.348095	-0.213748	-0.209516	1.2231	1.84836	1.25126
TP63	-0.319156	-0.11055	0.347355	1.36035	1.32297	1.39068
TP73	0.247411	-0.0228943	-0.271132	0.910192	1.27929	0.822287
TPSB2	0.324481	-0.477912	0.0423224	0.818605	1.40171	0.761822
TPST1	-0.104376	0.146346	-0.0543481	1.31174	1.40666	1.3639
TPTE2P1	0.180399	0.0204652	-0.2302	1.3554	1.37248	1.30029
TPTE2P6	-0.238496	-0.21342	0.367238	1.48736	1.045	1.19707
TRANK1	0.0884924	-0.285904	0.159002	1.51631	1.80611	1.69705
TREM1	0.0230253	0.203359	-0.264415	2.62185	2.66453	2.54574
TREM2	-0.202695	0.0374887	0.143718	1.47266	1.45066	1.72013
TREML2	-0.188787	0.0894237	0.0823096	1.9512	1.95021	2.00599
TREML3	-0.532329	0.365563	0.0288202	1.19457	0.596912	1.29975
TRPC1	-0.19418	0.0358465	0.138516	1.31291	1.34136	1.28131
TRPM1	0.181403	0.240073	-0.545905	1.61889	1.07882	1.78171
TRPM4	0.137438	-0.482984	0.244344	1.05774	1.07472	0.802022
TRPM8	-0.222085	-0.168984	0.325623	1.34225	1.39983	1.57128
TSKS	-0.719552	0.254202	0.26308	1.26804	1.07528	1.62604
TSPAN10	0.056502	0.146402	-0.228955	1.45622	1.73831	0.890707
TSPAN11	0.294626	-0.0286278	-0.33446	1.84596	1.64678	1.41938
TSPAN15	0.14082	-0.269139	0.0944433	1.31841	1.08722	1.11104
TSPAN9	0.17539	-0.103802	-0.0890327	0.881568	1.10749	1.23173
TTLL7	0.0625374	0.00245162	-0.0679413	0.756184	0.796469	1.27327
TUB	0.266732	-0.360604	0.0258536	0.929537	1.25626	1.11756
TUBB4	0.122367	0.0822092	-0.229648	0.671235	1.75735	0.809461
TUFT1	-0.140529	0.204843	-0.0888797	1.05331	0.968766	1.09986
TXLNB	0.168794	-0.157966	-0.0297451	1.77302	1.86512	1.46557
TXNIP	-0.0182768	0.008051	0.0100529	1.02561	1.05809	1.02494
TYROBP	-0.223029	0.282586	-0.109573	1.03158	1.0048	1.0137
UBA7	0.0064959	0.0490048	-0.0574874	1.73161	1.7483	1.70288
UBE2L6	-0.145901	0.204484	-0.0832768	1.38588	1.25531	1.40664
UBXN10	-0.200607	-0.25429	0.368954	1.28152	1.13865	1.34345
UCA1	-0.20485	-0.303623	0.402892	3.76836	3.97824	3.81507
UCN2	-0.188874	-0.178183	0.309053	1.68012	1.6129	1.20044
UGT3A1	0	0	0	0.991742	1.34687	0.957662
UNC45B	-0.0419606	0.206507	-0.193016	1.68453	1.23634	0.760371
UNC80	0.1679	-0.419224	0.174728	1.77213	1.89211	1.8874
UPB1	-0.436314	0.169119	0.184735	1.31981	1.41977	1.3111
UPK3A	-0.159319	0.191476	-0.0549601	0.544756	1.104	1.12704
UPP2	-0.0167655	0.322343	-0.393664	2.39951	2.01832	1.4188
USP44	-0.368076	0.148832	0.159001	1.81665	0.874275	1.94
VANGL2	-0.174235	0.0742323	0.0853728	1.48525	1.33552	2.15802
VCX	-0.0921471	0.0796563	0.0073508	1.41262	1.10449	1.54021
VENTX	-0.337174	-0.312098	0.488454	0.859869	0.798058	1.33574
VEPH1	-0.260371	-0.209303	0.378702	1.02634	1.14272	1.16254
VNN2	0.315007	-0.192167	-0.183289	1.69425	2.05679	2.25842
VSIG2	-0.260493	0.281128	-0.0739204	1.57964	1.69304	1.34161
VSIG4	0.0394831	0.299738	-0.431805	1.27278	1.0336	0.890484
VWA1	-0.109766	-0.0510536	0.147998	1.66678	1.50066	1.51187
VWA5A	0.0572961	0.0426658	-0.105518	1.97415	2.03079	2.24034
VWF	-0.188862	0.080809	0.0909779	0.876048	1.45879	1.23405
WBP5	-0.146792	0.255182	-0.146792	1.25792	1.36534	1.02711
WDR69	0	0	0	0.730363	1.16019	0.703195
WIPI1	0.110345	0.0655429	-0.194236	1.53372	1.77993	1.55137
WISP1	-0.426196	0.389263	-0.0800059	2.50394	1.9763	2.53427
WNT11	-0.414315	0.162281	0.17705	1.46051	1.26461	1.36091
WNT5B	0.154654	-0.280515	0.0888857	1.73474	2.19743	1.72332
WSB2	0.0166497	-0.0533079	0.035157	1.08348	1.14655	1.18783
XAF1	0.0992687	-0.148922	0.038219	1.25388	1.38287	1.3231
XKR5	0.0192003	-0.0181807	-0.00126248	1.91057	2.08593	1.96128
XKR9	-0.270579	0.487017	-0.378064	0.518784	0.605242	1.51151
YAP1	-0.0187951	0.0375759	-0.0195279	1.18244	1.18707	1.39581
YPEL1	0.0877392	0.0949758	-0.202159	0.981214	1.30719	0.824152
YPEL3	0.121585	-0.106558	-0.0243418	1.67011	1.5579	1.24017
YPEL4	-0.177316	0.212242	-0.0631581	1.10694	1.12509	0.990607
YPEL5	-0.1046	0.0772783	0.0213536	1.58748	1.43612	1.47835
ZAR1L	0.22322	-0.699465	0.283167	1.02593	1.53461	0.828767
ZBTB20	0.321144	0.108832	-0.572771	1.07826	0.937568	0.959008
ZBTB47	0.0408987	-0.0986504	0.0528879	1.27892	1.20002	1.27162
ZDHHC1	-0.509022	0.193423	0.206428	1.34281	1.37531	1.15783
ZDHHC19	0.0263896	-0.0198948	-0.00689065	1.40215	2.01025	1.52548
ZG16B	0.185725	-0.10894	-0.0964335	0.984145	0.903996	0.623066
ZNF223	0.157914	-0.231312	0.0460968	1.06111	1.03173	1.26827
ZNF300	0.39395	-0.252345	-0.240447	1.59783	1.93643	1.74349
ZNF366	-0.210989	0.151395	0.0362046	1.51607	1.21386	1.85807
ZNF385A	0.107457	0.0568928	-0.180414	1.03906	1.25682	0.841275
ZNF396	0.12697	-0.328391	0.15261	0.804324	1.30159	1.32442
ZNF467	0.277414	-0.0434899	-0.290401	1.02484	1.50754	0.611757
ZNF469	0.540005	-0.224916	-0.534543	1.36777	1.70252	1.21437
ZNF608	0.201357	-0.201158	-0.0286039	1.54909	1.43084	1.4654
ZNF648	0	0	0	1.40471	0.693709	0.957662
ZNF683	0.133321	0.184389	-0.382985	2.0038	1.62262	1.46421
ZNF813	0	0	0	0.730363	1.34687	0.703195
ZNF843	-0.406492	0.00968048	0.308957	1.03099	1.30267	0.891911
ZNF93	0.0765216	0.137341	-0.241865	1.0482	1.10124	1.24353
ZSCAN10	0	0	0	0.730363	0.693709	1.1739
ABCC2	0.168434	-0.479495	0.212798	-1.38912	-1.1661	-1.55585
ABCF2	-0.0959825	0.0391587	0.0522082	-1.01568	-1.15158	-0.944173
ACTL8	0.293076	-0.0853638	-0.264992	-1.0566	-1.07936	-1.07349
ADM2	0.0908156	0.057194	-0.160705	-1.81496	-1.61027	-1.96406
AIFM2	-0.0274584	0.162376	-0.152445	-1.08171	-1.20339	-1.18059
APLN	0.0381755	-0.13162	0.0845806	-0.836082	-0.687518	-1.14634
ASNS	-0.11386	0.131116	-0.0280465	-1.09516	-1.02645	-1.11703
B4GALNT1	0.148117	-0.126379	-0.0354168	-0.836758	-0.922224	-1.23039
BAG2	-0.168362	0.13643	0.0157337	-0.939853	-1.13134	-0.947898
BANP	-0.0146845	0.0360889	-0.0221025	-1.04	-1.20106	-1.50534
BEND3	-0.00633848	0.016879	-0.010693	-1.08972	-0.982199	-1.0205
BMP2	-0.0524385	0.0288708	0.0221642	-1.19781	-1.19179	-1.59429
BOP1	0.00741791	-0.0886739	0.0765021	-1.08303	-1.10446	-1.2135
C10orf2	0.0212815	-0.0657197	0.0421833	-1.03978	-1.04877	-1.03406
C12orf34	-0.01762	0.188611	-0.196818	-2.09647	-1.98744	-2.34735
C16orf46	0.0727569	-0.1425	0.0598086	-1.59576	-1.33742	-1.19023
C17orf51	-0.00229555	0.0958248	-0.100184	-1.27228	-1.08652	-1.149
C19orf76	-0.144635	0.0430233	0.0910176	-1.17777	-1.39411	-1.0606
C5orf4	0.301617	-0.185958	-0.170702	-1.01557	-0.846909	-0.828199
C9orf117	0.0511439	0.0181809	-0.0721307	-1.15527	-1.36813	-0.806523
C9orf140	-0.0824393	0.100017	-0.0236299	-1.07772	-1.09321	-1.29978
CALR3	0.425656	-0.59534	-0.00733532	-1.56909	-0.875384	-1.56909
CCDC58	-0.126916	0.123902	-0.00790609	-1.01419	-1.16265	-1.03402
CCDC86	-0.102336	0.157658	-0.0694489	-1.41012	-1.44827	-1.44811
CD3EAP	-0.0716932	0.0742812	-0.00629954	-1.04388	-1.03421	-1.01751
CDC20	-0.109782	0.138669	-0.0404036	-1.43753	-1.43221	-1.49392
CDC42EP2	0.35703	0.0844539	-0.601808	-1.01781	-1.17037	-1.30862
CHAC1	-0.0668778	0.118665	-0.059543	-1.61268	-1.90685	-2.48796
CHCHD10	-0.0171765	0.220458	-0.240023	-1.04018	-0.755276	-1.25796
CHORDC1	-0.0580581	-0.024846	0.0793178	-1.36843	-1.47414	-1.39672
CISD1	-0.176722	0.0914205	0.070211	-1.01832	-1.03593	-1.18342
CITED1	0.0708245	0.148856	-0.249834	-0.81985	-1.81159	-1.41757
CNKSR1	0.179233	0.166635	-0.424143	-2.14122	-1.28596	-2.19279
CNNM1	-0.139667	0.294167	-0.207403	-1.51032	-2.15105	-0.763919
CTU2	-0.101098	0.170429	-0.085767	-1.07427	-1.21832	-1.27905
CTXN1	0.158426	-0.0940282	-0.0785209	-1.06042	-0.510874	-1.24552
CUBN	0.0885059	-0.00464929	-0.0893456	-1.29261	-0.48952	-1.32669
DCAF4L1	0.125408	0.0660301	-0.213651	-1.6233	-0.822419	-1.38046
DDN	-0.11748	0.164979	-0.0633277	-1.32313	-1.22972	-1.37566
DLEU1	-0.165861	0.174732	-0.0293686	-1.0706	-1.25203	-0.83205
E2F5	-0.184065	0.0822718	0.0855559	-1.46994	-1.11506	-1.18166
EBNA1BP2	-0.114164	0.113512	-0.00835681	-1.11041	-1.37533	-1.18372
ECE2	-0.129838	0.201818	-0.095544	-1.43673	-1.84891	-1.58798
FAM104B	-0.155977	0.166787	-0.0292644	-0.967618	-1.15564	-1.00782
FAM78B	0.158852	-0.094586	-0.0784714	-0.831323	-1.28909	-1.64286
FAM81A	0.0466819	-0.160681	0.100992	-1.45672	-1.95856	-0.991229
FAM86A	-0.123635	0.230347	-0.13763	-1.43574	-1.30466	-1.50379
FAM86C2P	-0.0863511	0.140763	-0.0655058	-1.0822	-0.953266	-1.079
FDXACB1	-0.188543	0.08425	0.0872891	-1.09769	-1.36758	-1.03457
FGFBP3	-0.185201	0.117908	0.0500672	-1.13201	-1.27227	-0.902099
FJX1	-0.207482	0.282797	-0.124375	-1.0239	-1.12867	-1.32252
FKBP4	-0.125291	0.111707	0.00385345	-1.12869	-1.27368	-1.18211
FLJ43681	-0.0428206	0.0158495	0.0260184	-0.765593	-1.17651	-1.17651
FLRT2	-0.0919001	0.0650198	0.0223529	-0.936342	-1.36742	-0.944078
FOSL1	0.12169	-0.0166539	-0.114866	-1.34125	-0.882448	-1.14808
GABRG1	-0.352195	-0.00851541	0.289827	-1.39714	-0.974194	-0.708808
GALNTL4	-0.0180993	-0.0049431	0.0227407	-1.02854	-0.840216	-1.14376
GNB1L	-0.219781	0.111905	0.0849484	-1.00009	-0.925137	-1.49343
GPATCH4	-0.0199468	-0.0315698	0.0501545	-1.07809	-1.18156	-0.929078
GTDC1	-0.0085159	-0.0894957	0.0922537	-1.26717	-0.998378	-0.980555
HSD11B2	0.246583	-0.188204	-0.0955612	-1.15521	-0.592994	-1.20092
HSPA1A	-0.11341	0.215101	-0.12845	-1.71986	-1.69457	-1.87519
HSPA1B	-0.0808155	0.0847719	-0.00874475	-1.99598	-1.96532	-2.02919
HSPA8	-0.0996492	0.0180304	0.0760993	-1.55219	-1.78108	-1.48166
HSPH1	-0.0142782	-0.076086	0.0857243	-1.13667	-1.27894	-1.15507
IL12A	0.0231332	0.157571	-0.203521	-0.771135	-1.08205	-0.980341
IPO4	0.0423275	-0.0258765	-0.0174133	-1.00891	-0.94957	-1.05699
KBTBD6	0.0124045	-0.0707883	0.0555388	-1.12915	-0.97617	-0.970682
KCNG1	-0.149767	0.190412	-0.0626337	-1.06831	-0.989	-1.14805
KCNJ11	0.0355207	-0.207312	0.14916	-1.6192	-1.82125	-1.13605
KCTD12	-0.00326045	-0.0852163	0.0835391	-1.30504	-1.4221	-1.44275
KIAA1024	0.130699	-0.162528	0.0168075	-1.29296	-1.44577	-1.12239
KLHL31	0.290652	-0.420678	0.0422714	-1.03886	-1.33869	-1.03149
KMO	0.0495013	-0.185819	0.118948	-1.09935	-0.738408	-0.876657
LDHA	-0.145188	0.116093	0.0171272	-1.00025	-1.20204	-0.924031
LENG9	-0.153518	0.0895798	0.0522548	-0.935644	-1.22838	-1.10701
LOC100128881	0.316337	-0.0812094	-0.304772	-1.41276	-0.807423	-1.31383
LOC100129961	-0.341626	0.236043	0.0469673	-0.728571	-1.46526	-0.790799
LOC100289187	0.169242	-0.0430696	-0.144098	-1.70705	-1.42426	-1.72394
LOC100505894	-0.129183	0.23802	-0.141974	-1.05664	-1.18592	-1.25622
LOC100506054	-0.223767	0.249951	-0.0671722	-0.904118	-1.08962	-1.12383
LOC100506136	0.164704	-0.3844	0.15441	-1.93426	-1.24055	-1.23106
LOC285593	-0.596228	0.000627422	0.420168	-0.973126	-0.973126	-0.973126
LOC339666	0.473841	-0.0739357	-0.59694	-0.872135	-1.09921	-1.27217
LOC440600	-0.230727	0.0515437	0.152406	-1.09743	-0.78341	-0.917899
LOC727896	-0.0413404	0.00912189	0.0312617	-1.54375	-1.59717	-1.49988
LOC728739	-0.115838	-0.116659	0.207684	-1.08171	-1.23144	-0.58306
LOC729739	-0.509735	0.267664	0.129337	-1.02151	-1.04427	-1.0384
LOC92659	-0.0767918	0.110725	-0.0408746	-1.91885	-1.69934	-1.76059
LRIT3	-0.108029	0.213547	-0.13193	-0.699987	-0.675304	-1.23204
LRRC69	0.299185	-0.652755	0.180767	-1.28148	-0.528364	-1.1211
MAK	0.140669	-0.313532	0.12818	-1.19177	-0.837788	-1.74462
MANF	-0.138506	0.151252	-0.0276639	-0.953482	-1.08131	-1.02684
MET	-0.41902	-0.0998181	0.399353	-0.929434	-1.27975	-1.83421
MEX3B	-0.173265	0.118727	0.0389849	-0.993346	-1.06658	-0.689047
MGC12916	-0.272843	0.00775626	0.222708	-1.08986	-1.26995	-1.15232
MIR17HG	0.10745	-0.0174581	-0.0974155	-1.24458	-1.1664	-1.16948
MIR4482	0.0444607	-0.162218	0.104407	-0.878225	-0.878225	-0.878225
MPV17L2	-0.231365	0.228735	-0.0345093	-1.05486	-1.16772	-1.1836
MRM1	-0.133548	0.146209	-0.026564	-1.18774	-1.01882	-1.46378
MRTO4	-0.168523	0.181136	-0.0343514	-0.977728	-1.10995	-0.964675
MT1X	-0.168677	0.21627	-0.076104	-1.30465	-0.900414	-0.962631
MT2A	-0.133985	0.225156	-0.120629	-1.33189	-1.37457	-1.35636
MTHFD1L	-0.0590306	0.0457867	0.011274	-1.02836	-1.05646	-0.99921
MYC	0.00114918	0.0904015	-0.0976768	-1.16768	-0.984937	-1.31046
MYCL1	-0.140993	-0.0240671	0.150104	-0.991755	-1.08425	-1.12439
NAALAD2	0.436948	-0.209178	-0.356176	-1.17497	-0.67134	-1.13078
NDUFAF4	-0.100978	0.0826913	0.0123646	-1.12848	-1.17385	-1.14248
NHLH1	-0.0208144	0.119891	-0.108315	-1.14446	-1.11106	-0.65629
NKIRAS1	-0.112559	-0.0235881	0.126009	-1.23821	-1.07848	-0.965503
NOP16	-0.146407	0.185164	-0.0595613	-1.22838	-1.30783	-1.32949
NOP2	-0.0420188	0.0274706	0.0136145	-1.00602	-1.00983	-0.982716
NOXO1	0.114366	0.0149766	-0.140721	-1.81835	-2.11457	-1.98275
NR1D1	0.310561	-0.189159	-0.180016	-1.11106	-0.680149	-1.43051
NR1I3	-0.0553581	0.122866	-0.075902	-0.620437	-1.17953	-0.899914
NRG1	0.256069	-0.566928	0.17725	-0.903836	-0.956594	-1.15912
NTHL1	-0.187062	0.180571	-0.0170157	-0.8996	-1.03109	-1.09333
PALM2	0.20151	-0.0418616	-0.186561	-1.92998	-0.334571	-0.983004
PAM16	-0.295572	0.153033	0.102115	-0.975704	-1.16191	-1.36973
PDCD2L	-0.228832	0.179941	0.0198256	-0.923568	-1.13827	-1.13241
PINX1	-0.150759	0.166234	-0.0334249	-1.03569	-1.00368	-1.05433
PLCE1	0.240393	-0.188819	-0.0871784	-0.835568	-0.64316	-1.19904
PNO1	-0.0905723	0.0591864	0.0271142	-1.08939	-1.19839	-1.023
POLR3G	-0.0283084	-0.0175434	0.0447678	-1.33892	-1.40364	-1.20437
POTEKP	0.00416487	-0.355857	0.281792	-0.979039	-0.845123	-1.48879
PRDM12	0.274477	0.267722	-0.769701	-1.14886	-1.88008	-1.45229
PYCR1	-0.141529	0.174205	-0.0512499	-1.02514	-1.00512	-1.06017
RAB3A	0.15811	0.0281445	-0.210102	-1.12868	-0.853999	-1.67434
RBM44	0.404361	-0.373777	-0.144427	-0.737123	-0.892819	-1.33634
RGMB	0.318554	-0.285042	-0.101285	-1.66544	-0.862352	-1.29526
RPF2	-0.131807	0.0556109	0.0676575	-0.883343	-1.23107	-0.92013
RRP12	0.0129704	-0.0470132	0.0328497	-1.03905	-1.10968	-1.07125
RRP9	-0.114001	0.175475	-0.0791094	-1.32471	-1.31432	-1.35831
RRS1	-0.176923	0.14485	0.0140647	-0.98037	-1.09978	-1.16137
RSAD1	-0.0189792	0.108884	-0.0974628	-1.29721	-1.16105	-1.14426
SDF2L1	-0.158028	0.280009	-0.168856	-1.09961	-1.30957	-1.30421
SENP3-EIF4A1	0.0568191	0.213485	-0.321307	-0.627749	-0.954951	-1.44144
SESN2	-0.0755695	0.0845823	-0.0135499	-1.11064	-1.00969	-1.2232
SLC26A10	0.380618	-0.243908	-0.228291	-0.734955	-1.34172	-0.622856
SLC26A4	0.18517	-0.259719	0.0395574	-1.07922	-1.11587	-1.41556
SLC27A4	0.0489889	0.0365774	-0.0896009	-1.52209	-1.47955	-1.58179
SLC2A1	-0.0428913	0.0813139	-0.0419944	-1.10552	-1.02192	-1.29349
SLC5A6	-0.0671457	0.0316197	0.0332522	-1.16917	-1.22522	-1.17275
SLC7A5	0.0151682	0.0202257	-0.0360634	-1.3214	-1.27728	-1.36014
SNHG3	-0.0896009	0.17149	-0.0985109	-1.20714	-1.16856	-1.27502
SNHG4	0.101105	0.139555	-0.276066	-1.18478	-1.00127	-1.32247
SNORA10	-0.334759	0.251042	0.0243445	-1.29777	-1.37238	-1.17437
SNORA16A	-0.218519	0.0198359	0.172115	-1.09828	-1.51203	-0.622405
SNORA41	0.294776	-0.148098	-0.199476	-1.40299	-1.05913	-0.821636
SNORA51	0.264793	-0.249093	-0.063242	-0.823032	-1.04586	-1.27061
SNORA75	0.179926	-0.000158413	-0.205424	-1.03548	-1.26505	-0.718678
SNORA80B	0.0487104	0.0246441	-0.0763847	-1.31989	-0.538123	-1.65623
SNORD101	0.115522	0.211547	-0.398391	-1.25513	-1.00865	-1.08744
SNORD110	0.321851	-0.362974	-0.0402202	-0.861616	-1.49132	-0.925347
SNORD12C	0.0205486	0.107795	-0.139117	-0.570712	-1.48743	-0.755815
SNORD28	-0.18904	0.140537	0.0292698	-1.29068	-0.707575	-0.9154
SNORD32A	0.262761	-0.0239429	-0.292146	-1.10438	-1.18221	-0.529653
SNORD35A	-0.18764	0.0771299	0.0936163	-1.5969	-1.04736	-1.30405
SNORD51	0.0993056	0.123166	-0.252191	-1.23419	-0.844068	-0.70288
SNORD57	0.179253	0.0758059	-0.297337	-1.52261	-0.948925	-1.24656
SNORD60	0.244225	0.175316	-0.543021	-1.62411	-0.511287	-1.02459
SNORD74	0.0453658	0.312724	-0.461949	-1.0306	-1.40912	-0.502409
SNORD75	-0.00551569	-0.303475	0.25522	-0.973664	-0.583542	-1.42071
SNORD76	0.0997345	0.0285971	-0.138594	-0.935273	-0.948821	-1.1426
SNORD77	-0.12922	0.213316	-0.11041	-1.41333	-1.36982	-1.72358
SNORD78	0.207126	0.124092	-0.403939	-1.38568	-1.35803	-1.09264
SNORD83A	0.0857185	0.179172	-0.310165	-1.21837	-0.91265	-1.00774
SOX7	0.246852	-0.438601	0.105055	-1.25416	-1.18472	-1.16708
SRM	0.122685	0.104744	-0.258534	-1.34468	-0.84298	-1.49035
STAP2	0.182209	-0.0825036	-0.118785	-0.768813	-1.59729	-0.912093
STC2	0.0477635	-0.0367874	-0.0122928	-2.06919	-2.40244	-1.99989
STEAP1	-0.0598675	0.165796	-0.122078	-1.40931	-1.38051	-0.972385
SURF2	-0.0730792	0.129773	-0.0660171	-0.93161	-1.26627	-1.30083
TBC1D30	-0.022094	-0.0707431	0.0882099	-1.11946	-1.12755	-1.11284
TCP10L	-0.0896243	-0.000521291	0.0848723	-2.69258	-1.99887	-1.51868
THAP2	-0.125366	0.271895	-0.191268	-0.788425	-1.02421	-1.45446
TLCD1	-0.37925	0.305369	-0.00661095	-1.29056	-1.88457	-1.35278
TMEM74	-0.196678	0.0920485	0.0861857	-1.15363	-1.3901	-0.784058
TRMT61A	-0.0837645	0.124879	-0.0499174	-1.05864	-1.0307	-1.31882
TUBE1	-0.0180548	0.00540046	0.0124776	-1.09447	-1.14079	-1.17269
UFSP1	-0.135761	0.172579	-0.0547835	-0.884545	-1.29425	-1.10186
WDR4	0.0268409	0.0374936	-0.0665906	-1.26494	-1.23514	-1.26301
ZBTB9	-0.0996147	0.073026	0.0211912	-0.957884	-1.12409	-1.02143
ZC3H12B	-0.118167	0.17609	-0.0757865	-2.01861	-1.17366	-1.49042
ZNF185	-0.293117	0.284552	-0.0501574	-1.00157	-0.915116	-0.893315
ZNF503-AS2	-0.0848137	0.0538356	0.027257	-0.751409	-0.756996	-2.03852
ZNF576	-0.133992	0.126723	-0.00450396	-0.903682	-1.06334	-1.05145
ZNF593	-0.366596	0.231816	0.0704963	-0.961904	-0.967961	-1.37384
