# Supplementary material for: Chemotherapy Induces Senescence-Like Resilient Cells Capable of Initiating AML Recurrence
Source: Oxford University Press journal article supplement (doi:10.1158/2159-8290.cd-20-1375), 2021-01-26
Supplement: 21598290cd201375-sup-252204_2_supp_6841531_qm7m08.xlsx [file 21598290cd201375-sup-252204_2_supp_6841531_qm7m08.xlsx]

## Sheet: PS1566_PS2741_CIS_diffreg_log2
Genes	AML1566_AraC_1	AML1566_AraC_2	AML1566_AraC_3	AML2741_AraC_I	AML2741_AraC_I
CREB3L3	4.93448	5.26888	5.06512	2.51684	1.46356
AXL	3.98832	4.0921	3.95252	2.00447	1.85627
UCA1	3.76836	3.97824	3.81507	1.97119	1.97247
IP6K3	2.57117	1.79483	2.51369	4.21191	4.36479
LGALS3BP	2.76374	2.82825	2.71514	2.91626	3.04263
ENPP2	3.39273	3.39865	3.40762	1.85926	1.9475
CXCR3	2.86904	2.92791	2.60565	2.45026	2.55195
SMARCA1	3.04454	3.03355	2.80982	2.43163	2.07548
SIGLECP3	2.4107	2.66255	2.58127	2.83084	2.8606
CCL3	2.09513	2.00577	1.80366	3.32734	3.96193
C3	1.1613	1.19868	1.09755	4.61108	4.59585
COL9A2	1.77872	1.88957	1.66743	3.69745	3.62736
RASGRP3	2.28187	2.24701	2.31978	2.82474	2.98625
IL8	1.33295	1.29121	1.31208	3.97648	4.28866
PVRL4	0.499489	1.43232	1.20721	4.48721	4.56041
GPR68	1.88294	1.67673	1.79002	3.2696	3.34107
CCR7	2.95952	2.90719	2.49819	1.79524	1.75629
ABCC6	1.85003	1.79242	1.71458	3.1872	3.23173
IER3	1.36949	1.43511	1.37841	3.61859	3.95546
PLIN4	2.64496	2.64273	2.15498	2.06152	2.19953
EBI3	2.02106	1.80281	1.64363	3.09715	3.05617
ENPP3	2.30603	1.81801	2.36577	2.59175	2.49975
SLAMF7	1.72659	2.09328	1.76998	2.81527	3.07941
GZMA	2.19619	2.00097	2.21667	2.62732	2.32339
CRISPLD2	1.20606	1.30253	1.06468	3.78624	3.95779
CXCL11	1.74225	1.52306	1.68449	3.06236	3.11768
AQP1	2.9713	2.67747	2.81785	1.44341	1.2087
CXCL10	1.15003	1.62882	0.906244	3.65551	3.71786
LPAR5	2.85932	3.08786	2.7574	1.11237	1.07556
TLR7	2.099	2.04813	2.12071	2.33704	2.23752
IL4I1	1.21527	1.66962	1.06759	3.43256	3.41648
HMOX1	1.39554	1.5179	1.0257	3.22637	3.28522
IL7R	1.82546	1.8004	1.93732	2.33608	2.52308
A2M	2.02459	1.78382	1.80782	2.52285	2.08996
NEU4	2.24605	2.16527	1.73147	1.95263	2.09906
ITGAM	2.59856	2.37736	2.52584	1.34692	1.33151
SLC6A13	1.97521	2.02985	2.06116	2.47458	1.6065
RAB27B	2.37266	2.03059	2.05138	1.7639	1.87927
VNN2	1.69425	2.05679	2.25842	1.94916	2.11422
HDC	0.706311	1.39081	1.44091	3.17919	3.26306
OLAH	1.40471	1.9178	1.36192	2.98686	2.17497
IRF6	1.65025	1.53689	1.53569	2.45632	2.52607
EMR4P	1.62039	1.75108	1.69202	2.3924	2.20364
TP53INP1	1.68691	1.73982	1.65464	2.23405	2.32121
ABCA6	2.46479	2.35184	2.42427	1.10233	1.1626
HLA-DPA1	1.74311	1.59577	1.88323	2.04114	2.10742
FGR	2.27172	2.33186	2.19687	1.35144	1.21024
THBS1	2.12064	3.07447	2.14016	0.92621	1.04484
OPTN	2.22389	2.34384	1.93308	1.43975	1.3652
SYTL2	2.11793	1.93286	1.86678	1.75841	1.62548
DNAH8	2.09014	2.08224	2.23066	1.33758	1.54039
CD82	1.79335	1.9484	1.71709	1.86242	1.90441
CCL23	1.6361	1.55943	1.61187	2.16112	2.20481
ID2	1.72368	1.76655	1.65927	1.94088	2.04194
SRC	1.25071	1.63073	1.10262	2.53425	2.57809
PIEZO2	0.69165	1.39955	1.1748	2.81406	3.01199
CD84	1.16872	1.33197	1.36918	2.57034	2.60807
DDR1	1.58082	2.28872	2.30931	1.48267	1.35212
EMR1	1.53454	2.13152	2.23578	1.58904	1.50871
CXCR2	1.27143	1.10265	1.34914	2.48872	2.73122
CYP1A1	0.593495	1.02332	1.79915	2.66391	2.83354
ABCA10	2.04473	1.90387	2.03644	1.48703	1.37512
SUCNR1	1.83123	1.7603	1.81928	1.54684	1.82131
RAP1GAP	1.49847	1.70577	1.25328	2.06989	2.2333
LIF	1.46352	2.38157	1.5506	1.56804	1.79223
AIM2	1.51737	2.04094	1.8587	1.7116	1.57503
SERPINE1	1.51057	1.94878	1.82584	1.48904	1.91362
OASL	1.66106	2.02286	1.6996	1.78018	1.50972
MYLK3	1.82134	1.47796	1.91517	1.70903	1.73362
CDCP1	1.63865	2.26463	2.48364	1.0981	1.13284
HLA-DQB1	1.53067	1.39487	1.37034	1.95074	2.37061
IL1R1	1.7441	1.92981	2.30803	1.35424	1.25192
GPRC5C	1.60305	1.7425	1.66778	1.75825	1.79764
APOD	1.32177	1.50879	1.30271	2.15637	2.275
STX11	1.18235	1.18439	1.06576	2.67774	2.44768
CNR2	1.17233	1.39912	1.12986	2.40037	2.43606
KRT80	1.12451	1.08207	0.826024	2.5922	2.90561
LOC441869	0.991742	1.9178	1.36192	2.27015	1.98409
PMEL	1.93448	2.06655	2.01626	1.35199	1.15114
S100B	1.94522	1.62196	2.44209	1.37057	1.13963
APOC1	1.39534	1.48151	1.27035	2.0598	2.3079
CYGB	1.66583	1.45522	1.43341	1.99448	1.96057
FGFR3	2.24967	2.02303	2.02226	1.1857	0.965288
SAT1	1.3684	1.38114	1.35181	2.16154	2.14061
BEST1	1.96584	2.28894	2.15876	0.837677	1.1442
NCF1	1.20717	1.27858	1.16185	2.31278	2.40988
LOC100505702	1.61225	1.53279	1.92906	1.62068	1.67166
TPSB2	0.818605	1.40171	0.761822	2.62306	2.74441
MAP3K8	1.33096	1.44033	1.31791	2.06443	2.10807
SELENBP1	1.51405	1.09887	1.67442	1.80788	2.14611
CLEC4M	1.94798	1.86151	1.9538	1.23466	1.2325
SPP1	1.15068	1.00193	0.965238	2.44119	2.64424
HLA-DPB1	1.52568	1.37308	1.3885	1.91486	1.95986
ODF3L1	1.51439	1.99317	1.61595	1.17605	1.85626
PTPRH	1.26172	1.53128	1.27556	2.30451	1.77237
EPAS1	1.03904	1.53173	1.09838	2.18534	2.27369
CYP11A1	1.72539	1.51213	1.52823	2.04124	1.24821
IPCEF1	1.01986	0.967975	1.08733	2.61222	2.31584
HYDIN	2.05554	1.76246	2.08069	1.02815	1.07586
MLPH	0.991742	1.16019	1.36192	2.05271	2.43154
HLA-DOA	1.71748	0.755653	1.08612	2.30149	2.13564
KRT79	1.01104	1.11847	1.28368	2.29277	2.20346
LOC731424	1.4826	1.48557	1.5941	1.67575	1.65724
GPR183	1.06013	1.06834	1.07371	2.36012	2.3271
F2RL3	1.43707	1.52353	0.820794	2.09806	2.00922
EGR2	1.36006	1.18753	1.48346	1.20452	2.6343
NTRK1	1.8408	1.77101	1.38144	1.41873	1.44456
MMP19	1.52751	2.0005	1.80964	1.49417	1.0082
F5	0.795104	0.949673	1.10677	2.4472	2.53765
SLC23A1	1.52715	1.57377	1.35389	1.67513	1.68527
CASS4	1.66175	2.01349	1.77481	1.13681	1.22584
IRAK2	1.18371	1.17254	1.23371	1.9486	2.22987
GBP1P1	1.90378	1.73125	1.53111	1.33555	1.2573
GVINP1	1.61138	1.71024	1.81252	1.33668	1.21812
DPP4	1.63103	1.71643	1.88458	1.53072	0.90992
VWF	0.876048	1.45879	1.23405	2.00009	2.06058
NHLRC4	1.95263	1.90843	1.77037	0.973258	1.02429
SDS	1.96684	1.91166	1.53213	0.957647	1.22903
CMPK2	1.3505	1.35259	1.33611	1.74018	1.81132
LOC730227	1.50783	1.43321	1.86337	1.08435	1.65336
TSPAN10	1.45622	1.73831	0.890707	1.76003	1.66812
ADCY4	1.70344	1.69275	2.12878	1.04381	0.943283
FCGR1B	1.57772	1.20531	1.28615	1.89711	1.51512
MPZL2	0.950339	1.67576	1.55367	1.49163	1.79228
LDHD	1.26753	1.28652	1.35712	1.7622	1.77295
PRSS8	2.05833	1.69491	1.61063	0.959512	1.11897
CXCR5	1.61282	1.6299	0.832361	1.31141	2.04635
PRSS36	1.67539	1.63591	1.59114	1.32221	1.20506
CTSF	1.60798	1.80545	1.68837	1.08448	1.18518
CD300C	1.42943	1.63033	1.31898	1.2296	1.74234
CALCRL	1.63766	1.4568	1.57158	1.4402	1.23565
KCNMB1	1.62238	1.89518	1.75598	0.953366	1.11251
HECW2	1.7715	1.86642	1.7048	1.05985	0.909838
HLA-DRB6	1.30869	1.32439	1.08795	1.6976	1.8709
CYTH4	1.64299	1.70068	1.4317	1.23615	1.23276
RGS1	1.33412	1.33581	1.27508	1.52049	1.76893
ID2B	1.60701	1.22582	1.61438	1.45933	1.31425
ABCA12	0.715398	0.635942	1.13839	2.48549	2.23731
GBP1	0.932934	1.06685	1.24821	2.09521	1.85733
MGAT3	0.862241	1.2061	1.22432	1.9473	1.93729
ZNF683	2.0038	1.62262	1.46421	0.776164	1.2878
S100A2	1.34357	1.57843	1.4499	1.50409	1.27618
CSF1R	1.42104	1.47282	1.49793	1.21253	1.54277
ACSM1	1.29365	1.55418	1.73721	1.11822	1.33586
TP63	1.36035	1.32297	1.39068	1.51574	1.42091
DHRS3	1.25651	1.67127	1.91353	1.09048	1.07428
LOC100302650	0.939016	0.788754	0.991597	1.98845	2.24827
CCBP2	1.83604	1.77919	1.20474	0.977003	1.15347
APOBEC3H	1.35311	1.69802	1.40777	1.23171	1.20695
PIPOX	1.66334	1.62397	1.4799	0.955687	1.15313
COCH	1.45481	1.39947	1.36753	0.832993	1.79592
SIGLEC9	0.980632	0.96913	1.13351	1.88122	1.87441
DKFZp434J0226	0.929736	1.85294	1.6528	1.1489	1.24821
CDC42BPG	1.00822	1.19589	0.924976	1.7938	1.89883
COL6A1	1.36386	1.59393	1.04559	1.39814	1.39048
C21orf7	0.615643	1.5337	1.32234	1.7885	1.51621
UBXN10	1.28152	1.13865	1.34345	1.63255	1.37985
C11orf35	1.42404	1.5105	1.41901	1.34568	1.07503
TUB	0.929537	1.25626	1.11756	1.56942	1.90146
FCER1A	1.13939	0.954193	0.675225	1.99215	2.0046
SLC15A3	1.03655	1.15035	1.01767	1.85764	1.68002
AMPD3	1.4744	1.32997	1.48137	1.2068	1.23346
SLC25A18	1.34474	1.62627	1.41432	1.47085	0.867071
FCAMR	1.31902	1.13092	1.17465	1.40556	1.66856
TCN2	1.07308	1.34679	1.36593	1.15706	1.73894
FYB	1.09093	1.15934	1.23724	1.58537	1.6066
HTRA3	1.25851	1.43439	1.16276	1.75208	1.0574
SSC5D	1.32733	1.83096	1.46353	1.00179	1.03041
PLEKHB1	1.71023	0.913667	1.45135	1.51254	1.05806
FILIP1L	1.50677	1.37782	1.67594	1.01657	1.05975
PNCK	0.854874	1.21	0.820794	1.65727	2.0925
NCF1C	1.10008	1.25269	1.15596	1.49731	1.61162
NR5A1	1.41501	1.33632	0.815797	1.48854	1.55945
PTPRO	1.19581	1.14162	1.15321	1.64431	1.47871
HLA-DRA	1.20536	1.11378	1.20731	1.50886	1.52789
EPS8L2	0.989179	0.75558	1.22253	1.66895	1.89571
CCDC63	1.40865	1.26795	1.65615	1.25651	0.940541
YPEL5	1.58748	1.43612	1.47835	1.00343	1.00282
KIAA0664L3	1.38441	1.30866	1.17241	1.3618	1.27881
IFI44L	0.723933	1.11483	1.13709	1.45533	2.02581
PLIN2	1.13259	1.07315	1.06988	1.60406	1.56944
ARHGAP6	1.42751	1.35427	1.56371	1.00527	1.0969
LOC100506071	0.60699	1.12893	1.15118	1.81519	1.74151
SLC22A20	1.15108	1.59059	1.20053	1.27044	1.22277
FAM46C	1.34554	1.8205	0.950086	1.14506	1.15044
IQCD	1.23	1.2823	1.18458	1.41559	1.29377
RTP4	1.00826	1.1424	1.15547	1.55629	1.53444
FAM113B	1.43955	1.5411	1.1524	1.03453	1.22389
ITLN1	1.21295	1.16019	0.957662	1.46026	1.58467
PLXNB3	1.06909	1.62809	0.605703	1.58733	1.48247
TMPRSS13	1.07935	0.954751	0.723462	1.77931	1.82131
BTG2	1.22395	1.10844	1.09827	1.37356	1.5511
LRRC8E	0.760827	1.51374	0.975948	1.50826	1.57877
ZNF469	1.36777	1.70252	1.21437	1.05456	0.972712
ITGA2B	0.893613	1.63202	1.27824	1.26455	1.23909
VEPH1	1.02634	1.14272	1.16254	1.36726	1.6034
CCR8	1.51077	0.714208	1.01455	1.17605	1.85626
PEX11G	1.47375	1.60544	1.16883	1.00842	1.01115
EVPL	0.410914	0.945724	0.957662	2.06431	1.87498
LOC285972	1.41873	1.16482	1.0647	1.44906	1.13716
GRID2IP	0.601368	1.30622	1.20089	1.39702	1.72074
GPRC5B	1.66849	0.960477	1.37728	1.06714	1.15236
PAPSS2	0.908266	1.26921	1.13096	1.32889	1.57861
MIR4420	1.21729	1.15229	1.16924	1.1489	1.52616
TNFSF10	1.03697	0.928252	1.05128	1.67154	1.52253
DUSP10	1.14222	1.17611	1.13961	1.28268	1.42458
LAX1	0.814748	1.12877	1.2464	1.37955	1.5843
LOC286367	1.07903	1.23337	1.31087	1.29319	1.22016
CEL	1.17356	1.43747	1.01047	1.16948	1.32943
DDO	1.40471	1.16019	0.703195	1.49673	1.34223
C19orf69	0.969904	1.08628	0.915801	1.71953	1.38991
HLA-DRB5	1.13004	1.23333	1.09725	1.32836	1.28878
ALOX5	1.00473	1.28211	0.952501	2.09278	0.726862
GZMM	0.991742	0.693709	0.957662	1.64307	1.76533
MMP1	1.32342	0.944893	0.77193	1.46461	1.52616
LTBP1	1.36754	1.17997	1.47925	0.94003	1.05114
CCDC141	0.991742	0.945724	0.957662	1.32996	1.7851
BAIAP3	1.0501	1.41105	0.995998	1.32487	1.22019
CYTIP	1.09073	0.967992	1.06377	1.44491	1.37073
SLC26A11	1.08242	1.11812	0.634715	1.84679	1.25429
LOC100129269	0.968264	1.42543	1.07166	1.17668	1.27616
MICALL2	1.21537	1.46523	1.06341	1.2239	0.940833
TMEM198	1.21152	1.34564	0.801047	1.3033	1.23446
ST5	1.17438	1.38479	1.31206	1.16884	0.852724
FAM18B2	1.07577	1.1487	1.08201	0.954303	1.59578
PLIN5	1.40568	1.09776	0.980269	1.04419	1.32415
KRT7	1.07608	1.02332	0.820794	1.40311	1.51058
CLEC12A	1.08893	1.06543	1.07356	1.49581	1.08866
LOC253573	0.991742	0.945724	0.394024	1.67996	1.74151
RGS13	0.783453	1.34567	1.3648	0.908126	1.30943
CSGALNACT1	0.931514	0.798679	1.3522	1.3295	1.27314
PLEKHA7	1.1211	1.23309	1.0917	1.13358	1.09882
S100A3	1.30714	1.12265	0.721383	1.19365	1.3011
C15orf27	1.01818	0.993462	0.884128	1.24106	1.49462
LRRC29	1.26842	1.17921	1.12885	1.12303	0.911083
PGF	1.16054	1.30831	1.03687	0.929737	1.1411
PIK3IP1	1.11884	0.866183	1.10849	1.21456	1.26749
PRCD	1.15863	0.808323	1.10866	1.48031	1.01756
CYP2A6	0.843196	0.545163	1.52879	1.36876	1.27884
ICAM1	0.852188	1.21888	0.996531	1.23177	1.25385
LOC284648	0.977792	1.40727	1.17739	0.974666	0.972344
ASB9P1	0.993606	1.02125	0.813428	1.53072	1.11897
SLC2A14	0.894722	0.998386	0.858761	1.59985	1.08618
FCRLA	0.783142	0.765817	1.01674	1.17603	1.60922
ZNF843	1.03099	1.30267	0.891911	1.02529	1.05996
TYROBP	1.03158	1.0048	1.0137	1.12265	1.07297
KIR2DL4	1.17483	1.26129	0.989853	0.731122	1.07698
CHN2	1.01617	1.0381	1.14617	1.05954	0.956115
KIAA1683	0.63294	1.06699	0.937239	1.28409	1.27683
GHRL	1.02964	0.555654	1.27714	1.17044	1.16447
PKDREJ	0.78058	1.07483	1.06391	1.02758	1.24244
IFIT3	0.92041	0.98395	1.08581	1.04277	1.07906
CCDC24	1.03298	0.881472	1.05906	0.981625	1.14153
EGF	1.24449	0.576499	0.876848	1.1098	1.25746
GP6	1.34635	1.06313	0.395188	1.08711	1.14056
EFEMP2	1.01391	1.19014	0.886708	0.968372	0.965974
LOC643723	1.04056	0.605545	0.98308	1.32065	1.06967
KLF2	1.13401	1.10885	0.748944	0.784997	1.22852
LOC653712	1.0018	0.686774	1.17863	1.05791	0.986212
ADAMTS7	0.727857	1.16283	0.6678	1.26564	0.999737
ATP2B2	0.516781	1.12555	0.919807	1.06515	1.12937
ZG16B	0.984145	0.903996	0.623066	1.11465	1.07427
RBM44	-0.737123	-0.892819	-1.33634	-0.866523	-0.864193
TUBE1	-1.09447	-1.14079	-1.17269	-1.01685	-1.14276
SNORD83A	-1.21837	-0.91265	-1.00774	-1.24858	-1.19022
B4GALNT1	-0.836758	-0.922224	-1.23039	-1.45869	-1.1642
APLN	-0.836082	-0.687518	-1.14634	-1.45326	-1.52006
MYC	-1.16768	-0.984937	-1.31046	-1.11319	-1.18231
SNORA80B	-1.31989	-0.538123	-1.65623	-0.99782	-1.39276
C9orf140	-1.07772	-1.09321	-1.29978	-1.17204	-1.27833
ASNS	-1.09516	-1.02645	-1.11703	-1.37027	-1.39935
FAM78B	-0.831323	-1.28909	-1.64286	-0.907375	-1.38311
SNORD51	-1.23419	-0.844068	-0.70288	-2.06678	-1.28478
STEAP1	-1.40931	-1.38051	-0.972385	-1.08201	-1.47695
SNORA10	-1.29777	-1.37238	-1.17437	-1.20891	-1.33458
SNORA41	-1.40299	-1.05913	-0.821636	-1.24637	-1.86602
SNORD110	-0.861616	-1.49132	-0.925347	-1.55696	-1.59673
SNORD57	-1.52261	-0.948925	-1.24656	-1.25906	-1.59915
E2F5	-1.46994	-1.11506	-1.18166	-1.58415	-1.34392
SNORA51	-0.823032	-1.04586	-1.27061	-1.99473	-1.67101
SNORD28	-1.29068	-0.707575	-0.9154	-2.06069	-1.84587
FAM81A	-1.45672	-1.95856	-0.991229	-1.26379	-1.28697
RGMB	-1.66544	-0.862352	-1.29526	-1.25485	-1.89629
SNORD77	-1.41333	-1.36982	-1.72358	-1.76543	-0.796081
PRDM12	-1.14886	-1.88008	-1.45229	-1.45699	-1.47513
CNKSR1	-2.14122	-1.28596	-2.19279	-0.985152	-1.30417
GALNTL4	-1.02854	-0.840216	-1.14376	-3.29277	-1.94187
CDC20	-1.43753	-1.43221	-1.49392	-2.43899	-2.45398
