# Supplementary material for: Chemotherapy Induces Senescence-Like Resilient Cells Capable of Initiating AML Recurrence
Source: Oxford University Press journal article supplement (doi:10.1158/2159-8290.cd-20-1375), 2021-01-26
Supplement: 21598290cd201375-sup-252204_2_supp_6841533_qmzm08.xlsx [file 21598290cd201375-sup-252204_2_supp_6841533_qmzm08.xlsx]

## Sheet: table_summary1
AML_case	imm_diag	age	gender	fab	bm_mnc_bl	ktypedesc	Mutations
AML2012	Acute myeloid Leukemia	64	M	NA	0.57	46,XY,add(3)(q27),del(5)(q31q34),del(7)(q22)[7]/45,idem,-7[9]	ESCO1 p.E130_V131insValGlu, U2AF1 p.S34F
AML2741	Acute myeloid Leukemia	52	M	M1	NA	46,XY,del(2)(p13p23),t(4;13)(q31;q34),add(4)(q?25),del(6)(q13q25),t(9;22)(q34;q11.2),del(10)(q24),add(16)(q24)[20]	RUNX1 p.D198G, NOTCH1 p.R879G, IDH1 p.R132C
AML2920	Undifferentiated AML	73	M	NA	0.35	43~45,XY,add(2)(p13),del(3)(q21),-5,der(9)t(9;13)(p13;q14)add(9)(q34) der(11)add(11)(p15)add(11)(q23)[3],der(11)r(11;?)(p15q23;?)[16], der(12)add(12)(p11.2)dup(12)(q13q22)[19],-13,-18,+0~2r,+0~2mar[cp20]	DICER1 p.I461V, TP53 p.Y220C, TP53 p.C238Y, DNMT3A c.2409T>A,
AML3252	Acute myeloid Leukemia	64	M	NA	NA	47,XY,+8[2]/46,XY,t(3;17)(q21;q25)[2]/46,XY[16]	SF3B1 p.K666N, TRIM24 p.R910C, FLT3-ITD, RUNX1 p.R162G
AML1566	Acute myeloid Leukemia	70	M	M5	0.17	none performed	TET2 p.P363fs, TET2 p.S1284_F1285del, APC p.A1879S, PTPRT p.Y87T, PTPRT p.Y810R
AML2928	Differentiated AML	65	F	NA	0.55	45,XX,inv(3)(q21q26.2),del(5)(q13q33),der(7;16)(q10;p10)	BPTF p.P2803_P2804insProProAlaProProAlaPro, DNMT3A c.1937_1941del, NRAS p.Q61R
AMLmx1 (AML1956)	Acute myeloid Leukemia	53	F	M4	21	47,XX,+8[8]/46,XX[14]	FLT3-ITD
AMLmx2(AML2837)	Acute myeloid Leukemia	43	F	M1	63	47,XX,+8[13]	FLT3-ITD
53	Acute myeloid Leukemia	-	F		99	normal	FLT3-ITD
262	Acute myeloid Leukemia	-	F	M2	57	normal	FLT3-ITD
325	Acute myeloid Leukemia	-	F	NOS	91	ND	FLT3 p.D835Y, NPM1 p.W288fs, IDH1 p.R132H
Legend: bl, blood; bm, bone marrow; FAB, French–American–British leukemia classification; mnc, mononuclear cells;
